# Supplementary material for: Elephants in the neighborhood: patterns of crop-raiding by Asian elephants within a fragmented landscape of Eastern India
Source: PeerJ. 2020 Jul 2;8:e9399. doi: 10.7717/peerj.9399 (PMC7335499; doi:10.7717/peerj.9399)
Supplement: Data S2 [file peerj-08-9399-s002.xlsx]

## Sheet: Sheet1
grid_number	Crop raids	Human density	Distance from protected areas (meters)	Length of river(km)	Length_Road(kms)	Area_Forest (sq.m)	Area_Agriculture(sq.m)	Area_Tea_Plantations(sq.m)	Area of riverine patches	Area_Human_Settlements(sq.m)	Area_River Bed(sq.m)
1	0	0	1107.34	1.39	2.35	4.81162e+06	0	0	0	0	0
2	0	0	1107.34	0.00	0	3.60871e+06	300726	0	300726	0	601452
3	0	28	0	0.00	0.00	0	2.40581e+06	601452	601452	0	1.2029e+06
4	0	24	0	0.00	0.00	2.10508e+06	0	1.80436e+06	601452	300726	0
5	0	0	0	0.00	0.00	4.21016e+06	0	601452	0	0	0
6	0	0	13083.4	0.00	0.00	0	0	3.30799e+06	601452	300726	601452
7	0	0	10867.1	0.00	0.00	2.40581e+06	300726	1.50363e+06	0	601452	0
8	0	0	8661.28	0.00	0.00	4.81162e+06	0	0	0	0	0
9	0	32	0	0.00	0.00	601452	2.70653e+06	0	601452	0	902178
10	0	23	0	0.00	0.00	3.60871e+06	601452	300726	0	300726	0
11	0	0	735.168	0.00	0.00	4.51089e+06	0	0	0	300726	0
12	0	0	17458.9	0.00	0.00	601452	2.70653e+06	1.2029e+06	0	300726	0
13	0	65	15222.7	0.00	0.00	2.40581e+06	1.50363e+06	902178	0	0	0
14	0	43	12986.5	0.00	0.00	0	3.90944e+06	300726	0	0	601452
15	0	30	10750.3	0.00	0.00	1.50363e+06	2.40581e+06	902178	0	0	0
16	0	39	8514.12	0.00	0.00	300726	1.80436e+06	300726	300726	0	2.10508e+06
17	0	0	6277.92	0.00	0.00	1.50363e+06	1.80436e+06	1.80436e+06	300726	601452	0
18	0	0	4041.72	0.00	0.00	0	3.90944e+06	300726	0	300726	1.50363e+06
19	0	0	1805.52	0.00	0.00	1.50363e+06	2.10508e+06	902178	0	0	300726
20	0	0	93.1124	0.00	0.00	0	3.60871e+06	0	300726	300726	601452
21	0	0	1509.03	0.00	0.00	2.40581e+06	1.80436e+06	300726	0	300726	0
22	0	30	0	0.00	0.00	0	3.30799e+06	601452	0	300726	1.80436e+06
23	0	26	0	0.00	0.00	601452	4.21016e+06	1.2029e+06	0	0	0
24	0	21	959.793	0.00	0.00	0	3.90944e+06	601452	300726	1.2029e+06	0
25	0	0	3195.99	0.00	0.00	902178	1.50363e+06	2.40581e+06	0	0	0
26	0	0	17549.3	0.00	0.00	902178	3.30799e+06	1.80436e+06	0	0	0
27	0	36	15326.3	0.00	0.00	0	3.00726e+06	300726	601452	0	902178
28	0	33	13107.9	0.00	0.00	300726	3.00726e+06	1.50363e+06	0	0	0
29	0	29	10896.5	0.00	0.00	0	2.10508e+06	902178	0	0	1.80436e+06
30	0	34	8698.4	0.00	0.00	601452	1.2029e+06	902178	601452	0	1.50363e+06
31	0	35	6525.25	0.00	0.00	300726	3.00726e+06	601452	0	0	902178
32	0	34	4419.48	0.00	0.00	0	2.70653e+06	1.80436e+06	300726	0	0
33	0	30	2536.29	0.00	0.00	601452	1.2029e+06	2.10508e+06	601452	300726	0
34	0	23	1601.63	0.00	0.00	1.2029e+06	2.40581e+06	300726	300726	300726	300726
35	0	0	1.12529	0.00	0.00	1.2029e+06	2.10508e+06	1.50363e+06	0	0	0
36	0	0	1105.61	0.00	0.00	601452	1.50363e+06	2.70653e+06	0	0	0
37	0	32	0	0.00	0.00	601452	2.70653e+06	902178	300726	0	300726
38	0	21	0	0.00	0.00	1.2029e+06	2.70653e+06	902178	0	0	0
39	0	21	1248.98	0.00	0.00	0	3.60871e+06	601452	300726	0	300726
40	0	0	3296.48	0.00	0.00	0	4.21016e+06	0	300726	0	300726
41	0	0	12009.2	0.00	0.00	0	4.81162e+06	0	0	0	0
42	0	0	13983.8	0.00	0.00	1.80436e+06	3.00726e+06	1.2029e+06	0	0	0
43	0	0	19698.9	0.00	0.00	4.81162e+06	0	0	0	0	0
44	0	35	17463.2	0.00	0.00	4.81162e+06	0	0	0	0	0
45	0	34	15227.6	0.00	0.00	4.81162e+06	0	0	0	0	0
46	0	28	12992.2	0.00	0.00	4.81162e+06	0	0	0	0	0
47	0	29	10757.2	0.00	0.00	4.81162e+06	0	0	0	0	0
48	0	38	8522.82	0.00	0.00	4.51089e+06	0	0	0	300726	0
49	0	34	6289.67	0.00	0.00	4.81162e+06	0	0	0	0	0
50	0	30	4060.04	0.00	0.00	3.60871e+06	0	0	300726	902178	0
51	0	35	1844.47	0.00	0.00	3.30799e+06	0	902178	300726	300726	0
52	0	21	166.544	0.00	0.00	3.00726e+06	0	300726	0	1.50363e+06	0
53	0	21	0.210732	0.00	0.00	3.90944e+06	0	601452	0	300726	0
54	0	21	961.907	0.00	0.00	4.81162e+06	300726	601452	0	300726	0
55	0	0	2130.48	0.00	0.00	2.70653e+06	1.2029e+06	902178	0	0	0
56	0	0	3720.59	0.00	0.00	6.01452e+06	0	0	0	0	0
57	0	0	5733.36	0.00	0.00	3.60871e+06	0	0	0	1.2029e+06	0
58	0	34	0	0.00	0.00	6.01452e+06	0	0	0	0	0
59	0	29	14.6353	0.00	0.00	4.21016e+06	0	601452	0	0	0
60	0	22	1284.9	0.00	0.00	5.71379e+06	0	300726	0	0	0
61	0	21	2793.08	0.00	0.00	4.51089e+06	0	300726	0	0	0
62	0	21	4376.02	0.00	0.00	5.41307e+06	0	601452	0	0	0
63	0	21	6197.69	0.00	0.00	3.60871e+06	300726	3.30799e+06	0	300726	0
64	0	0	8230.08	0.00	0.00	3.60871e+06	0	601452	0	0	0
65	0	0	10345.2	0.00	0.00	4.51089e+06	0	300726	0	0	0
66	0	23	12503.1	0.00	0.00	2.40581e+06	0	1.50363e+06	0	0	0
67	0	31	13579.1	0.00	0.00	4.81162e+06	0	0	0	0	0
68	0	0	12260.1	0.00	0.00	3.90944e+06	300726	601452	0	0	0
69	0	0	11232.1	0.00	0.00	4.21016e+06	0	601452	0	0	0
70	0	43	10586.7	0.00	0.00	5.71379e+06	0	0	0	300726	0
71	0	45	10381	0.00	0.00	1.2029e+06	1.50363e+06	2.10508e+06	601452	601452	0
72	0	0	10409.1	0.00	0.00	902178	3.00726e+06	2.10508e+06	0	0	0
73	0	34	19338	0.00	0.00	3.00726e+06	1.2029e+06	1.80436e+06	0	0	0
74	0	35	19693.4	0.00	0.00	5.11234e+06	300726	601452	0	0	0
75	0	40	17466.3	0.00	0.00	3.90944e+06	601452	300726	0	0	0
76	0	28	15231.2	0.00	0.00	4.51089e+06	0	300726	0	0	0
77	0	34	12996.5	0.00	0.00	3.90944e+06	300726	300726	0	0	300726
78	0	34	10762.3	0.00	0.00	0	4.51089e+06	300726	0	0	0
79	0	34	8529.32	0.00	0.00	0	3.90944e+06	300726	0	300726	300726
80	0	34	6298.45	0.00	0.00	0	2.70653e+06	0	300726	0	1.80436e+06
81	0	34	4073.73	0.00	0.00	0	4.81162e+06	0	0	0	0
82	0	28	1873.57	0.00	0.00	0	4.21016e+06	0	0	300726	300726
83	0	21	290.988	0.00	0.00	0	4.21016e+06	0	0	0	601452
84	0	21	0	0.00	0.00	0	4.21016e+06	601452	0	0	0
85	0	21	0	0.00	0.00	0	4.81162e+06	0	601452	300726	300726
86	0	21	909.223	0.00	0.00	0	6.01452e+06	0	0	0	0
87	0	21	2741.25	0.00	0.00	0	7.51815e+06	0	0	0	0
88	0	21	4753.96	0.00	0.00	0	5.71379e+06	300726	0	0	0
89	0	0	6908.44	0.00	0.00	0	6.01452e+06	0	0	0	0
90	0	0	9101.4	0.00	0.00	0	5.11234e+06	0	0	300726	601452
91	0	0	11311.7	0.00	0.00	0	4.51089e+06	0	902178	0	601452
92	0	35	748.519	0.00	0.00	0	3.90944e+06	0	1.80436e+06	0	300726
93	0	33	0	0.00	0.00	0	3.90944e+06	0	0	601452	300726
94	0	32	1391.6	0.00	0.00	3.30799e+06	0	1.50363e+06	0	0	0
95	0	22	3596.49	0.00	0.00	601452	2.70653e+06	1.50363e+06	0	0	0
96	0	27	4893.45	0.00	0.00	1.50363e+06	902178	2.40581e+06	0	0	0
97	0	34	6578.42	0.00	0.00	1.80436e+06	2.70653e+06	1.50363e+06	0	0	0
98	0	34	8520.53	0.00	0.00	300726	2.40581e+06	1.80436e+06	0	0	300726
99	0	28	10577.3	0.00	0.00	300726	3.90944e+06	300726	300726	0	0
100	0	31	12577.7	0.00	0.00	1.80436e+06	1.80436e+06	1.2029e+06	0	0	0
101	0	33	11955.4	0.00	0.00	300726	2.70653e+06	1.80436e+06	0	0	0
102	0	32	10433.3	0.00	0.00	0	4.21016e+06	601452	0	0	0
103	0	41	9204.38	0.00	0.00	0	4.81162e+06	0	0	0	0
104	0	30	8405.09	0.00	0.00	1.2029e+06	3.60871e+06	0	0	0	0
105	0	31	8144.82	0.00	0.00	300726	4.21016e+06	300726	0	0	0
106	0	35	8180.62	0.00	0.00	0	5.11234e+06	300726	300726	0	300726
107	0	37	8651.48	0.00	0.00	0	3.90944e+06	601452	300726	0	0
108	0	0	9632.1	0.00	0.00	0	4.81162e+06	0	0	0	0
109	0	0	10987.1	0.00	0.00	0	3.30799e+06	1.50363e+06	0	0	0
110	0	0	12595.3	0.00	0.00	0	3.60871e+06	0	300726	902178	0
111	0	0	16264	0.00	0.00	300726	3.90944e+06	601452	0	0	0
112	0	47	18233.9	0.00	0.00	0	5.71379e+06	300726	0	0	0
113	0	51	19579.8	0.00	0.00	2.40581e+06	1.50363e+06	2.10508e+06	0	0	0
114	0	49	17478	0.00	0.00	1.50363e+06	2.40581e+06	2.10508e+06	0	0	0
115	0	42	15244.6	0.00	0.00	3.60871e+06	1.80436e+06	601452	0	0	0
116	0	42	13012.2	0.00	0.00	4.21016e+06	1.50363e+06	300726	0	0	0
117	0	43	10781.2	0.00	0.00	902178	2.10508e+06	902178	0	902178	0
118	0	34	8553.21	0.00	0.00	3.00726e+06	1.50363e+06	1.2029e+06	300726	0	0
119	0	34	6330.73	0.00	0.00	902178	4.51089e+06	300726	0	300726	0
120	0	32	4124.05	0.00	0.00	601452	3.90944e+06	902178	0	601452	0
121	0	28	1980.56	0.00	0.00	902178	3.00726e+06	902178	0	0	0
122	0	28	386.035	0.00	0.00	300726	3.90944e+06	300726	300726	0	0
123	0	22	0	0.00	0.00	300726	3.90944e+06	300726	0	300726	0
124	0	21	0	0.00	0.00	0	4.81162e+06	0	0	0	0
125	0	21	24.6045	0.00	0.00	300726	4.51089e+06	0	0	0	0
126	0	21	2260.8	0.00	0.00	300726	4.51089e+06	0	0	0	0
127	0	21	4497	0.00	0.00	3.60871e+06	0	902178	0	300726	0
128	0	21	6733.2	0.00	0.00	3.60871e+06	0	902178	0	300726	0
129	0	21	8851.24	0.00	0.00	2.10508e+06	1.50363e+06	601452	0	300726	300726
130	0	0	10959.6	0.00	0.00	3.90944e+06	300726	601452	0	0	0
131	0	0	0	0.00	0.00	1.2029e+06	1.50363e+06	1.2029e+06	300726	0	601452
132	0	28	1212.73	0.00	0.00	3.30799e+06	601452	902178	0	0	0
133	0	27	1775.81	0.00	0.00	3.60871e+06	300726	601452	0	300726	0
134	0	30	3541.42	0.00	0.00	601452	4.21016e+06	601452	300726	0	300726
135	0	26	5641.1	0.00	0.00	300726	3.30799e+06	902178	601452	601452	300726
136	0	28	7818.23	0.00	0.00	0	3.60871e+06	1.2029e+06	601452	601452	0
137	0	28	9955.52	0.00	0.00	300726	3.00726e+06	2.70653e+06	0	0	0
138	0	37	10628.9	0.00	0.00	0	4.21016e+06	300726	0	0	300726
139	0	31	10381.7	0.00	0.00	0	2.70653e+06	601452	300726	902178	300726
140	0	31	8801.26	0.00	0.00	601452	1.80436e+06	2.40581e+06	0	0	0
141	0	35	7302.19	0.00	0.00	0	2.40581e+06	0	1.2029e+06	0	1.2029e+06
142	0	41	6262.97	0.00	0.00	0	4.51089e+06	0	300726	0	0
143	0	39	5908.62	0.00	0.00	0	4.81162e+06	0	0	0	0
144	0	34	5958.02	0.00	0.00	0	4.51089e+06	0	300726	0	0
145	0	28	6590.43	0.00	0.00	0	4.51089e+06	300726	0	0	0
146	0	28	7834.7	0.00	0.00	0	4.81162e+06	0	0	0	0
147	0	30	9451.53	0.00	0.00	0	4.21016e+06	0	300726	300726	0
148	0	34	11281.4	0.00	0.00	0	4.81162e+06	0	0	0	0
149	0	44	13237.1	0.00	0.00	0	3.30799e+06	0	2.40581e+06	0	300726
150	0	45	15269.5	0.00	0.00	0	4.51089e+06	0	0	300726	0
151	0	57	17235.4	0.00	0.00	0	4.81162e+06	0	0	0	0
152	0	67	17805.9	0.00	0.00	300726	4.51089e+06	0	0	0	0
153	0	52	17623.1	0.00	0.00	0	4.81162e+06	0	0	0	0
154	0	32	15518.3	0.00	0.00	0	4.51089e+06	0	300726	0	1.2029e+06
155	0	39	13331.9	0.00	0.00	0	3.60871e+06	300726	601452	300726	0
156	0	32	11164.7	0.00	0.00	0	2.40581e+06	601452	902178	300726	601452
157	0	28	9032.19	0.00	0.00	300726	3.60871e+06	601452	300726	0	0
158	0	24	6962.32	0.00	0.00	0	3.90944e+06	0	300726	0	601452
159	0	21	5042.6	0.00	0.00	0	2.10508e+06	0	601452	0	2.10508e+06
160	0	27	3426.58	0.00	0.00	0	4.81162e+06	0	0	0	0
161	0	28	2074.44	0.00	0.00	0	4.81162e+06	0	0	0	0
162	0	23	317.608	0.00	0.00	0	4.81162e+06	0	0	0	0
163	0	21	0	0.00	0.00	0	4.81162e+06	0	0	0	0
164	0	21	895.896	0.00	0.00	0	4.51089e+06	300726	0	0	0
165	0	21	2053.32	0.00	0.00	0	3.30799e+06	300726	300726	0	902178
166	0	21	3913.76	0.00	0.00	0	3.30799e+06	0	902178	0	601452
167	0	21	6039.28	0.00	0.00	300726	4.51089e+06	0	601452	0	601452
168	0	21	8184.5	0.00	0.00	0	2.10508e+06	0	601452	601452	1.50363e+06
169	0	0	10300.9	0.00	0.00	0	4.21016e+06	0	0	601452	0
170	0	0	735.308	0.00	0.00	300726	3.90944e+06	0	300726	300726	0
171	0	28	0	0.00	0.00	0	3.90944e+06	0	300726	601452	0
172	0	28	959.793	0.00	0.00	0	1.80436e+06	0	300726	1.50363e+06	1.2029e+06
173	0	31	3195.99	0.00	0.00	0	4.21016e+06	601452	0	0	0
174	0	29	5432.19	0.00	0.00	0	4.51089e+06	0	0	300726	0
175	0	28	7668.39	0.00	0.00	0	4.81162e+06	0	0	0	0
176	0	29	8125.76	0.00	0.00	0	4.21016e+06	601452	0	0	0
177	0	37	8464.87	0.00	0.00	0	4.51089e+06	0	0	0	300726
178	0	38	8786.68	0.00	0.00	0	3.00726e+06	1.80436e+06	0	0	0
179	0	28	7226.76	0.00	0.00	0	3.30799e+06	1.50363e+06	0	0	0
180	0	33	5643.76	0.00	0.00	0	3.30799e+06	1.50363e+06	0	0	0
181	0	65	4215.97	0.00	0.00	601452	2.40581e+06	902178	902178	0	0
182	0	54	3672.42	0.00	0.00	0	4.21016e+06	601452	0	0	0
183	0	34	3751.21	0.00	0.00	0	3.00726e+06	1.80436e+06	0	0	0
184	0	31	4687.52	0.00	0.00	0	3.00726e+06	1.80436e+06	0	0	0
185	0	34	6316.65	0.00	0.00	0	3.60871e+06	902178	0	300726	0
186	0	34	8236.07	0.00	0.00	0	3.60871e+06	902178	0	300726	0
187	0	35	10284.3	0.00	0.00	0	3.30799e+06	601452	601452	300726	0
188	0	39	12398	0.00	0.00	0	3.30799e+06	1.2029e+06	300726	0	0
189	0	35	14548.2	0.00	0.00	0	4.51089e+06	300726	0	0	0
190	0	53	15286.1	0.00	0.00	300726	4.51089e+06	0	0	0	0
191	0	43	15617.8	0.00	0.00	601452	3.90944e+06	300726	0	0	0
192	0	50	16257.8	0.00	0.00	0	0	0	300726	300726	0
193	0	28	16079.1	0.00	0.00	2.40581e+06	300726	0	300726	0	0
194	0	40	14000.4	0.00	0.00	4.81162e+06	0	0	0	0	0
195	0	28	11954.6	0.00	0.00	3.90944e+06	601452	300726	0	0	300726
196	0	37	9993.44	0.00	0.00	6.01452e+06	0	0	0	0	0
197	0	21	8169.61	0.00	0.00	2.70653e+06	300726	0	601452	0	0
198	0	21	6565.26	0.00	0.00	3.90944e+06	300726	0	0	300726	0
199	0	25	5105.69	0.00	0.00	3.60871e+06	0	0	0	1.2029e+06	0
200	0	28	3093.69	0.00	0.00	4.21016e+06	0	0	0	601452	0
201	0	28	890.459	0.00	0.00	4.21016e+06	300726	0	0	0	0
202	0	25	0	0.00	0.00	5.71379e+06	300726	0	0	0	0
203	0	21	111.901	0.00	0.00	1.2029e+06	0	0	0	601452	0
204	0	21	1371.47	0.00	0.00	4.51089e+06	0	0	0	300726	0
205	0	21	3296.42	0.00	0.00	4.21016e+06	0	300726	0	300726	0
206	0	21	5313.51	0.00	0.00	601452	0	0	0	601452	0
207	0	21	7441.64	0.00	0.00	3.90944e+06	0	902178	0	0	0
208	0	27	9620.06	0.00	0.00	4.21016e+06	0	300726	0	300726	0
209	0	0	1429.69	0.00	0.00	2.70653e+06	0	1.80436e+06	0	300726	0
210	0	29	0	0.00	0.00	4.51089e+06	0	300726	0	0	0
211	0	37	959.793	0.00	0.00	3.30799e+06	0	1.50363e+06	0	0	0
212	0	43	3195.99	0.00	0.00	4.81162e+06	0	0	0	0	0
213	0	36	5407.18	0.00	0.00	4.21016e+06	0	601452	0	0	0
214	0	28	5908.25	0.00	0.00	3.60871e+06	0	1.2029e+06	0	0	0
215	0	40	5892.1	0.00	0.00	4.21016e+06	0	601452	0	0	0
216	0	36	6352.43	0.00	0.00	3.00726e+06	2.10508e+06	601452	0	300726	0
217	0	28	7211.77	0.00	0.00	0	4.51089e+06	300726	0	0	0
218	0	28	5637.33	0.00	0.00	0	4.51089e+06	0	0	300726	0
219	0	28	4088.5	0.00	0.00	300726	4.21016e+06	0	300726	0	0
220	0	75	2528.23	0.00	0.00	0	4.81162e+06	0	0	0	0
221	0	54	1436.22	0.00	0.00	0	4.51089e+06	0	300726	0	0
222	0	31	1636.28	0.00	0.00	0	4.51089e+06	0	300726	0	0
223	0	34	3257.74	0.00	0.00	0	4.51089e+06	0	300726	0	0
224	0	34	5343.89	0.00	0.00	0	4.21016e+06	0	601452	0	0
225	0	28	7516.44	0.00	0.00	0	4.81162e+06	0	0	0	0
226	0	42	9717.89	0.00	0.00	300726	3.90944e+06	0	601452	0	0
227	0	46	11831.3	0.00	0.00	0	4.51089e+06	0	300726	0	0
228	0	46	12999.7	0.00	0.00	601452	3.00726e+06	1.2029e+06	0	0	0
229	0	48	13058.8	0.00	0.00	0	3.60871e+06	902178	0	300726	0
230	0	28	13445.8	0.00	0.00	0	2.70653e+06	0	902178	0	1.2029e+06
231	0	32	14184.5	0.00	0.00	300726	3.30799e+06	1.2029e+06	601452	0	601452
232	0	34	15213.8	0.00	0.00	0	4.21016e+06	601452	0	0	0
233	0	38	14981.5	0.00	0.00	300726	2.70653e+06	1.2029e+06	0	601452	0
234	0	28	13089	0.00	0.00	300726	3.60871e+06	902178	0	0	0
235	0	39	11326.4	0.00	0.00	601452	3.30799e+06	601452	0	300726	0
236	0	21	9681.71	0.00	0.00	0	3.00726e+06	1.80436e+06	0	0	0
237	0	21	7805.11	0.00	0.00	0	3.30799e+06	300726	902178	300726	1.2029e+06
238	0	21	5650.3	0.00	0.00	0	3.00726e+06	300726	1.2029e+06	0	300726
239	0	27	3604	0.00	0.00	3.30799e+06	0	1.2029e+06	0	300726	0
240	0	28	1860.34	0.00	0.00	3.90944e+06	601452	300726	0	0	0
241	0	26	166.703	0.00	0.00	3.60871e+06	601452	601452	0	0	0
242	0	21	0	0.00	0.00	300726	4.51089e+06	902178	0	300726	0
243	0	21	482.136	0.00	0.00	902178	2.70653e+06	1.2029e+06	0	0	0
244	0	21	2718.34	0.00	0.00	0	4.21016e+06	601452	0	0	0
245	0	21	4954.54	0.00	0.00	0	4.81162e+06	0	0	0	0
246	0	30	7190.74	0.00	0.00	300726	3.90944e+06	601452	0	0	0
247	0	34	9426.94	0.00	0.00	0	4.81162e+06	0	0	0	0
248	0	0	1689.31	0.00	0.00	0	4.81162e+06	0	0	0	0
249	0	0	1958.54	0.00	0.00	0	3.60871e+06	1.2029e+06	0	0	0
250	0	34	3629.48	0.00	0.00	0	4.21016e+06	601452	0	0	0
251	0	34	4470.94	0.00	0.00	0	4.81162e+06	0	0	0	0
252	0	34	3687.19	0.00	0.00	0	4.81162e+06	0	0	0	0
253	0	32	3661.41	0.00	0.00	0	6.01452e+06	0	0	0	0
254	0	33	4359.9	0.00	0.00	0	4.81162e+06	0	0	0	0
255	0	34	5645.18	0.00	0.00	0	3.30799e+06	0	902178	0	601452
256	0	34	4053.14	0.00	0.00	0	3.30799e+06	0	300726	0	1.2029e+06
257	0	39	2478.94	0.00	0.00	0	6.01452e+06	0	0	0	0
258	0	60	1081.11	0.00	0.00	0	4.81162e+06	0	0	0	0
259	0	36	0	0.00	0.00	0	4.81162e+06	0	0	0	0
260	0	33	656.64	0.00	0.00	0	2.70653e+06	0	300726	0	1.80436e+06
261	0	29	2892.84	0.00	0.00	4.51089e+06	0	0	0	300726	0
262	0	28	5129.04	0.00	0.00	4.81162e+06	0	0	0	0	0
263	0	28	7140.2	0.00	0.00	4.51089e+06	300726	0	0	0	0
264	0	30	8809.11	0.00	0.00	3.30799e+06	601452	0	0	902178	0
265	0	35	10568.3	0.00	0.00	4.51089e+06	0	0	0	300726	0
266	0	35	10767.8	0.00	0.00	4.81162e+06	0	0	0	0	0
267	0	37	10835.2	0.00	0.00	4.51089e+06	0	0	0	300726	0
268	0	34	11298.3	0.00	0.00	4.81162e+06	0	0	0	0	0
269	0	32	12167.3	0.00	0.00	4.51089e+06	300726	0	0	0	0
270	0	31	13352.7	0.00	0.00	4.81162e+06	0	0	0	0	0
271	0	28	14770.6	0.00	0.00	0	6.01452e+06	0	0	0	0
272	0	28	14272	0.00	0.00	0	4.81162e+06	0	0	0	0
273	0	28	12074.8	0.00	0.00	0	4.81162e+06	0	0	0	0
274	0	22	9839.29	0.00	0.00	0	5.71379e+06	0	300726	0	0
275	0	21	7604.29	0.00	0.00	0	4.81162e+06	0	0	0	0
276	0	21	5370.22	0.00	0.00	0	4.51089e+06	0	300726	0	0
277	0	29	3139.35	0.00	0.00	0	4.81162e+06	0	0	0	0
278	0	27	927.451	0.00	0.00	0	4.81162e+06	0	0	0	0
279	0	22	43.4979	0.00	0.00	0	4.81162e+06	0	0	0	0
280	0	21	22.1324	0.00	0.00	0	4.81162e+06	0	0	0	0
281	0	21	1597.2	0.00	0.00	4.51089e+06	300726	0	0	0	0
282	0	28	3211.03	0.00	0.00	3.90944e+06	0	0	0	300726	0
283	0	31	5242.99	0.00	0.00	4.81162e+06	0	0	0	0	0
284	0	34	7391.39	0.00	0.00	4.51089e+06	0	0	0	300726	0
285	0	0	9581.08	0.00	0.00	4.81162e+06	0	0	0	0	0
286	0	0	4711.79	0.00	0.00	4.21016e+06	0	0	0	601452	0
287	0	34	2962.65	0.00	0.00	4.51089e+06	0	0	0	1.50363e+06	0
288	0	34	1514.47	0.00	0.00	5.41307e+06	0	0	0	601452	0
289	0	34	1448.26	0.00	0.00	4.21016e+06	0	0	0	601452	0
290	0	34	2783.39	0.00	0.00	4.21016e+06	0	0	0	601452	0
291	0	34	4545.21	0.00	0.00	2.40581e+06	1.2029e+06	1.2029e+06	0	0	0
292	0	30	2535.68	0.00	0.00	1.50363e+06	902178	2.40581e+06	0	0	0
293	0	40	991.342	0.00	0.00	3.60871e+06	1.50363e+06	601452	300726	0	0
294	0	44	0	0.00	0.00	300726	3.60871e+06	601452	300726	0	0
295	0	46	0	0.00	0.00	1.50363e+06	2.10508e+06	601452	601452	0	0
296	0	34	656.64	0.00	0.00	902178	2.40581e+06	1.50363e+06	0	0	0
297	0	30	2767.67	0.00	0.00	300726	3.90944e+06	0	0	0	601452
298	0	29	4049.22	0.00	0.00	300726	3.90944e+06	0	601452	0	0
299	0	29	5693.5	0.00	0.00	0	4.81162e+06	0	0	0	0
300	0	37	7643.76	0.00	0.00	0	4.81162e+06	0	0	0	0
301	0	46	8864.07	0.00	0.00	0	4.81162e+06	0	0	0	0
302	0	45	8533.27	0.00	0.00	0	4.81162e+06	0	0	0	0
303	0	28	8618.3	0.00	0.00	0	4.81162e+06	0	0	0	0
304	0	28	9194.61	0.00	0.00	0	4.81162e+06	0	0	0	0
305	0	32	10244.1	0.00	0.00	0	4.81162e+06	0	0	0	0
306	0	33	11628.5	0.00	0.00	902178	902178	3.00726e+06	0	0	0
307	0	28	13203.3	0.00	0.00	1.2029e+06	1.80436e+06	1.80436e+06	0	0	0
308	0	28	14382.6	0.00	0.00	1.50363e+06	1.2029e+06	2.10508e+06	0	0	0
309	0	33	12268.7	0.00	0.00	601452	3.00726e+06	1.2029e+06	0	0	0
310	0	35	10076	0.00	0.00	300726	2.10508e+06	3.60871e+06	0	0	0
311	0	21	7908.63	0.00	0.00	300726	2.40581e+06	2.10508e+06	0	0	0
312	0	23	5791.02	0.00	0.00	300726	2.70653e+06	1.2029e+06	0	601452	0
313	0	40	3796.51	0.00	0.00	300726	1.80436e+06	601452	0	2.10508e+06	0
314	0	39	1866.56	0.00	0.00	0	4.21016e+06	300726	0	300726	0
315	0	33	368.177	0.00	0.00	2.70653e+06	300726	1.80436e+06	0	0	0
316	0	25	537.315	0.00	0.00	0	4.51089e+06	0	0	300726	0
317	0	28	2362.98	0.00	0.00	601452	4.21016e+06	0	0	0	0
318	0	28	4486.88	0.00	0.00	0	3.90944e+06	0	0	902178	0
319	0	34	6325.09	0.00	0.00	0	4.51089e+06	0	0	300726	0
320	0	34	8194.46	0.00	0.00	0	4.51089e+06	0	0	300726	0
321	0	0	9618.68	0.00	0.00	0	1.80436e+06	0	0	0	300726
322	0	0	10460.5	0.00	0.00	300726	2.70653e+06	1.80436e+06	0	0	0
323	0	0	11612.6	0.00	0.00	902178	3.30799e+06	1.80436e+06	0	0	0
324	0	0	2712.4	0.00	0.00	601452	3.00726e+06	1.2029e+06	0	0	0
325	0	0	978.789	0.00	0.00	0	3.60871e+06	1.2029e+06	0	0	0
326	0	34	881.319	0.00	0.00	0	3.90944e+06	902178	0	0	0
327	0	30	2513.34	0.00	0.00	0	2.70653e+06	0	601452	300726	1.2029e+06
328	0	28	4384.08	0.00	0.00	0	3.00726e+06	1.50363e+06	0	0	300726
329	0	28	2238.28	0.00	0.00	902178	902178	2.10508e+06	0	902178	0
330	0	31	825.709	0.00	0.00	2.10508e+06	2.10508e+06	601452	0	0	0
331	0	43	988.719	0.00	0.00	1.2029e+06	2.40581e+06	1.2029e+06	0	0	0
332	0	46	0	0.00	0.00	0	3.90944e+06	300726	0	601452	0
333	0	37	46.9776	0.00	0.00	1.2029e+06	2.40581e+06	1.2029e+06	0	0	0
334	0	34	1043.22	0.00	0.00	0	3.00726e+06	1.80436e+06	0	0	0
335	0	35	2651.04	0.00	0.00	601452	2.40581e+06	902178	0	902178	0
336	0	39	4798.64	0.00	0.00	1.80436e+06	1.2029e+06	1.50363e+06	0	300726	0
337	0	37	7002.43	0.00	0.00	300726	4.51089e+06	0	0	0	0
338	0	36	6740.03	0.00	0.00	0	4.81162e+06	0	0	0	0
339	0	35	6299.92	0.00	0.00	0	4.81162e+06	0	0	0	0
340	0	28	6414.2	0.00	0.00	0	4.81162e+06	0	0	0	0
341	0	28	7168.65	0.00	0.00	0	4.21016e+06	0	0	300726	300726
342	0	29	8470.6	0.00	0.00	0	4.51089e+06	0	0	300726	0
343	0	37	10036.5	0.00	0.00	0	4.51089e+06	0	300726	0	0
344	0	37	11710.4	0.00	0.00	0	4.51089e+06	0	0	0	300726
345	0	28	13544.1	0.00	0.00	0	5.71379e+06	0	300726	0	0
346	0	35	12845.3	0.00	0.00	0	3.30799e+06	0	902178	300726	300726
347	0	40	10770.1	0.00	0.00	300726	1.2029e+06	1.80436e+06	300726	1.2029e+06	0
348	0	27	8777.66	0.00	0.00	300726	3.30799e+06	1.2029e+06	902178	300726	0
349	0	25	6772	0.00	0.00	902178	2.10508e+06	1.50363e+06	0	300726	0
350	0	32	4796.9	0.00	0.00	2.10508e+06	902178	1.50363e+06	0	300726	0
351	0	29	3157.82	0.00	0.00	300726	2.10508e+06	1.80436e+06	0	601452	0
352	0	23	2192.57	0.00	0.00	300726	1.50363e+06	1.80436e+06	601452	601452	0
353	0	28	1721.16	0.00	0.00	2.40581e+06	1.2029e+06	601452	0	601452	0
354	0	28	2857.55	0.00	0.00	601452	601452	2.40581e+06	601452	300726	300726
355	0	28	4818.45	0.00	0.00	3.00726e+06	601452	902178	0	300726	0
356	0	33	6836.61	0.00	0.00	1.50363e+06	1.2029e+06	1.80436e+06	300726	0	0
357	0	34	7183	0.00	0.00	2.40581e+06	601452	601452	902178	300726	0
358	0	0	7553.3	0.00	0.00	902178	1.50363e+06	2.10508e+06	300726	1.2029e+06	0
359	0	28	8502.07	0.00	0.00	1.50363e+06	1.80436e+06	1.80436e+06	300726	601452	0
360	0	30	9883.43	0.00	0.00	902178	2.40581e+06	902178	300726	300726	0
361	0	0	11531.3	0.00	0.00	300726	1.80436e+06	1.50363e+06	1.2029e+06	0	0
362	0	0	4014.83	0.00	0.00	1.50363e+06	1.50363e+06	1.80436e+06	0	0	0
363	0	34	3110.55	0.00	0.00	300726	1.2029e+06	2.70653e+06	0	601452	0
364	0	34	3079.58	0.00	0.00	300726	3.60871e+06	601452	0	300726	0
365	0	28	3889.02	0.00	0.00	0	4.81162e+06	0	0	0	0
366	0	29	5293.9	0.00	0.00	0	4.81162e+06	0	0	0	0
367	0	28	3715.18	0.00	0.00	0	4.81162e+06	0	0	0	0
368	0	31	2997.58	0.00	0.00	300726	4.51089e+06	0	0	0	0
369	0	46	1290.53	0.00	0.00	0	4.81162e+06	0	0	0	0
370	0	51	0	0.00	0.00	0	4.51089e+06	0	300726	0	0
371	0	46	393.907	0.00	0.00	0	3.90944e+06	300726	601452	0	0
372	0	34	560.409	0.00	0.00	0	4.81162e+06	1.2029e+06	0	0	0
373	0	38	2531.72	0.00	0.00	0	3.90944e+06	0	0	601452	300726
374	0	34	4734.44	0.00	0.00	601452	2.40581e+06	601452	300726	902178	0
375	0	43	6071.88	0.00	0.00	3.00726e+06	300726	1.2029e+06	0	300726	0
376	0	45	4725.13	0.00	0.00	3.00726e+06	902178	1.2029e+06	0	902178	0
377	0	42	4069.82	0.00	0.00	1.80436e+06	1.2029e+06	1.80436e+06	0	0	0
378	0	30	4245.15	0.00	0.00	601452	1.80436e+06	2.10508e+06	0	300726	0
379	0	39	5321.43	0.00	0.00	0	3.00726e+06	902178	300726	601452	0
380	0	28	6885.31	0.00	0.00	0	4.51089e+06	0	0	300726	0
381	0	28	8586.82	0.00	0.00	0	4.21016e+06	300726	0	0	300726
382	0	40	10493.9	0.00	0.00	0	3.90944e+06	300726	601452	0	0
383	0	30	12508.4	0.00	0.00	0	4.81162e+06	0	0	0	0
384	0	37	13698	0.00	0.00	0	4.81162e+06	0	0	0	0
385	0	39	11772.5	0.00	0.00	0	4.81162e+06	0	0	0	0
386	0	36	9781.57	0.00	0.00	0	4.21016e+06	601452	0	0	0
387	0	30	7915.19	0.00	0.00	300726	4.51089e+06	0	0	0	0
388	0	38	6305.17	0.00	0.00	0	4.81162e+06	0	0	0	0
389	0	37	5159.71	0.00	0.00	300726	4.21016e+06	300726	0	0	0
390	0	34	4190.28	0.00	0.00	0	4.81162e+06	0	0	0	0
391	0	35	3954.01	0.00	0.00	300726	4.21016e+06	300726	0	0	0
392	0	30	4573.85	0.00	0.00	0	5.41307e+06	601452	0	0	0
393	0	41	5456.99	0.00	0.00	0	4.51089e+06	300726	0	0	0
394	0	34	4976.42	0.00	0.00	0	3.90944e+06	0	300726	0	601452
395	0	31	4948.94	0.00	0.00	300726	4.51089e+06	0	0	0	0
396	0	0	5474.01	0.00	0.00	4.81162e+06	0	0	0	0	0
397	0	28	6726.36	0.00	0.00	3.00726e+06	902178	902178	0	0	0
398	0	30	8405.34	0.00	0.00	4.81162e+06	0	0	0	0	0
399	0	39	10294.3	0.00	0.00	3.60871e+06	601452	601452	0	0	0
400	0	0	5895.43	0.00	0.00	4.51089e+06	300726	0	0	0	0
401	0	0	5326.12	0.00	0.00	4.51089e+06	300726	0	0	0	0
402	0	34	5308.28	0.00	0.00	3.60871e+06	601452	601452	0	0	0
403	0	30	5812.88	0.00	0.00	1.80436e+06	601452	2.40581e+06	0	0	0
404	0	36	6829.01	0.00	0.00	3.60871e+06	0	1.2029e+06	0	0	0
405	0	37	5698.81	0.00	0.00	2.70653e+06	1.2029e+06	902178	0	0	0
406	0	29	4294.55	0.00	0.00	902178	1.2029e+06	2.40581e+06	0	0	300726
407	0	34	2691.76	0.00	0.00	902178	2.10508e+06	1.50363e+06	0	300726	0
408	0	44	1740.77	0.00	0.00	601452	1.50363e+06	2.10508e+06	0	601452	0
409	0	46	2346.25	0.00	0.00	0	2.70653e+06	1.2029e+06	0	300726	601452
410	0	28	2667.3	0.00	0.00	1.2029e+06	601452	1.80436e+06	0	1.2029e+06	0
411	0	28	3615.89	0.00	0.00	0	3.60871e+06	1.2029e+06	0	0	0
412	0	30	4528.39	0.00	0.00	300726	2.40581e+06	1.80436e+06	0	300726	0
413	0	32	4492.03	0.00	0.00	902178	1.80436e+06	3.00726e+06	0	300726	0
414	0	39	3017.61	0.00	0.00	300726	3.30799e+06	601452	0	601452	0
415	0	46	1852.78	0.00	0.00	0	1.80436e+06	2.70653e+06	0	300726	0
416	0	41	2200.7	0.00	0.00	0	3.00726e+06	1.2029e+06	0	601452	0
417	0	29	3718.48	0.00	0.00	0	3.60871e+06	601452	0	601452	0
418	0	40	5493.91	0.00	0.00	1.50363e+06	300726	2.40581e+06	0	300726	300726
419	0	37	7517.27	0.00	0.00	0	2.70653e+06	2.10508e+06	0	0	0
420	0	28	9636.88	0.00	0.00	601452	2.10508e+06	1.80436e+06	300726	0	0
421	0	28	11799	0.00	0.00	5.71379e+06	0	300726	0	0	0
422	0	30	13915.3	0.00	0.00	4.51089e+06	0	300726	0	0	0
423	0	30	12850.4	0.00	0.00	300726	902178	1.2029e+06	1.50363e+06	300726	601452
424	0	30	11056	0.00	0.00	1.2029e+06	1.80436e+06	1.2029e+06	0	601452	0
425	0	30	9444.47	0.00	0.00	601452	1.80436e+06	2.40581e+06	0	0	0
426	0	30	8146.61	0.00	0.00	1.50363e+06	1.2029e+06	2.10508e+06	0	0	0
427	0	35	7138.32	0.00	0.00	3.60871e+06	0	1.2029e+06	0	0	0
428	0	30	6342.19	0.00	0.00	0	4.81162e+06	0	0	0	0
429	0	28	6189.2	0.00	0.00	0	902178	0	0	0	3.90944e+06
430	0	40	5547.98	0.00	0.00	0	4.81162e+06	0	0	0	0
431	0	46	3769.99	0.00	0.00	0	4.81162e+06	0	0	0	0
432	0	42	2767.16	0.00	0.00	0	4.81162e+06	0	0	0	0
433	0	28	2718.11	0.00	0.00	0	3.90944e+06	0	0	0	902178
434	0	28	3576.84	0.00	0.00	0	2.10508e+06	0	300726	0	2.40581e+06
435	0	40	5296.35	0.00	0.00	0	2.70653e+06	902178	0	902178	300726
436	0	34	7307.97	0.00	0.00	0	3.00726e+06	902178	0	902178	0
437	0	34	9287.1	0.00	0.00	0	2.70653e+06	1.80436e+06	0	300726	0
438	0	0	11298.5	0.00	0.00	0	3.90944e+06	1.2029e+06	601452	300726	0
439	0	0	13379.5	0.00	0.00	0	3.30799e+06	601452	0	902178	0
440	0	28	15504.3	0.00	0.00	0	1.80436e+06	1.2029e+06	300726	300726	0
441	0	0	17436.3	0.00	0.00	3.60871e+06	1.2029e+06	0	0	0	0
442	0	0	7554.12	0.00	0.00	3.60871e+06	902178	300726	0	0	0
443	0	42	7541.5	0.00	0.00	4.21016e+06	601452	0	0	0	0
444	0	45	7906.3	0.00	0.00	3.30799e+06	300726	1.2029e+06	0	0	0
445	0	53	8682.23	0.00	0.00	3.00726e+06	300726	1.2029e+06	0	0	300726
446	0	31	7437.76	0.00	0.00	1.2029e+06	2.40581e+06	601452	300726	300726	0
447	0	33	5851.83	0.00	0.00	1.80436e+06	2.70653e+06	300726	0	0	0
448	0	53	4486.77	0.00	0.00	4.81162e+06	0	0	0	0	0
449	0	57	3976.97	0.00	0.00	4.81162e+06	0	0	0	0	0
450	0	36	4286.05	0.00	0.00	4.51089e+06	0	0	0	300726	0
451	0	28	4664.38	0.00	0.00	4.81162e+06	0	0	0	0	0
452	0	28	3650.78	0.00	0.00	4.81162e+06	0	0	0	0	0
453	0	28	2374.26	0.00	0.00	4.81162e+06	0	0	0	0	0
454	0	28	2787.34	0.00	0.00	4.81162e+06	0	0	0	0	0
455	0	28	1639.25	0.00	0.00	4.21016e+06	0	0	0	601452	0
456	0	34	82.1288	0.00	0.00	4.21016e+06	0	0	0	601452	0
457	0	40	678.284	0.00	0.00	0	4.21016e+06	0	300726	0	300726
458	0	34	2619.51	0.00	0.00	0	4.21016e+06	0	601452	0	0
459	0	29	4818.12	0.00	0.00	0	4.81162e+06	0	0	0	0
460	0	29	7040.35	0.00	0.00	300726	3.30799e+06	0	902178	0	300726
461	0	30	9207.72	0.00	0.00	0	4.81162e+06	0	0	0	0
462	0	31	10976.1	0.00	0.00	0	6.01452e+06	0	0	0	0
463	0	30	12569	0.00	0.00	0	4.81162e+06	0	0	0	0
464	0	42	13951.8	0.00	0.00	0	0	0	0	0	0
465	0	30	12608.8	0.00	0.00	4.81162e+06	0	0	0	0	0
466	0	32	11220.4	0.00	0.00	6.01452e+06	0	0	0	0	0
467	0	37	10143	0.00	0.00	4.51089e+06	0	300726	0	0	0
468	0	34	9146.09	0.00	0.00	5.41307e+06	0	601452	0	0	0
469	2	32	8359.57	0.00	0.00	5.41307e+06	300726	300726	0	0	0
470	1	31	6609.22	0.00	0.00	5.71379e+06	300726	0	0	0	0
471	2	41	4579.29	0.00	0.00	3.90944e+06	300726	601452	0	0	0
472	0	46	2627.93	0.00	0.00	3.30799e+06	601452	601452	0	0	300726
473	0	43	733.147	0.00	0.00	4.21016e+06	0	601452	0	0	0
474	0	34	522.229	0.00	0.00	2.70653e+06	601452	1.2029e+06	0	0	300726
475	0	40	2359.15	0.00	0.00	3.60871e+06	902178	300726	0	0	0
476	0	43	4313.69	0.00	0.00	3.30799e+06	1.2029e+06	300726	0	0	0
477	0	46	6325.13	0.00	0.00	4.21016e+06	601452	0	0	0	0
478	0	41	8447.9	0.00	0.00	4.81162e+06	0	0	0	0	0
479	0	32	10583.8	0.00	0.00	4.51089e+06	0	0	0	300726	0
480	0	39	12506.4	0.00	0.00	4.51089e+06	300726	0	0	0	0
481	0	28	14348.3	0.00	0.00	2.40581e+06	601452	902178	0	902178	0
482	0	32	16288.2	0.00	0.00	2.40581e+06	300726	902178	0	902178	300726
483	0	0	18296.3	0.00	0.00	4.81162e+06	0	0	0	0	0
484	0	0	20180.3	0.00	0.00	4.21016e+06	0	0	300726	0	0
485	0	0	9785.75	0.00	0.00	5.71379e+06	300726	0	0	0	0
486	0	44	9776.05	0.00	0.00	6.01452e+06	0	0	0	0	0
487	0	53	10059.6	0.00	0.00	4.81162e+06	0	0	0	0	0
488	0	50	10591.4	0.00	0.00	4.51089e+06	300726	0	0	0	0
489	0	37	9003.11	0.00	0.00	3.60871e+06	300726	0	0	601452	0
490	0	35	7546.93	0.00	0.00	3.30799e+06	902178	0	0	300726	0
491	0	78	6549.74	0.00	0.00	4.51089e+06	0	0	0	300726	0
492	0	82	6213.17	0.00	0.00	4.51089e+06	0	0	0	300726	0
493	0	48	5795.21	0.00	0.00	3.90944e+06	0	0	0	902178	0
494	0	40	3789.14	0.00	0.00	4.51089e+06	0	0	0	300726	0
495	0	30	2118.94	0.00	0.00	3.90944e+06	601452	0	0	300726	0
496	0	28	645.813	0.00	0.00	3.30799e+06	902178	0	0	601452	0
497	0	28	1191.63	0.00	0.00	902178	2.40581e+06	1.50363e+06	0	0	0
498	0	28	12.1655	0.00	0.00	1.80436e+06	1.2029e+06	1.80436e+06	0	0	0
499	0	31	0	0.00	0.00	0	2.10508e+06	2.10508e+06	0	601452	0
500	0	41	302.028	0.00	0.00	2.10508e+06	601452	1.80436e+06	0	300726	0
501	0	50	2538.23	0.00	0.00	300726	3.90944e+06	0	0	0	601452
502	0	51	4719.78	0.00	0.00	0	3.60871e+06	902178	0	300726	0
503	0	49	6369.65	0.00	0.00	0	1.80436e+06	1.80436e+06	0	0	0
504	0	50	7814.47	0.00	0.00	0	3.30799e+06	1.2029e+06	0	300726	0
505	0	42	9404.9	0.00	0.00	1.80436e+06	1.50363e+06	1.2029e+06	0	300726	0
506	0	41	11178.3	0.00	0.00	0	3.60871e+06	601452	0	601452	0
507	1	45	13091.1	0.00	0.00	0	3.60871e+06	902178	0	300726	0
508	0	63	14337.6	0.00	0.00	0	4.21016e+06	601452	0	0	0
509	0	50	13133.7	0.00	0.00	0	2.70653e+06	1.50363e+06	601452	0	0
510	0	50	12139.2	0.00	0.00	4.21016e+06	300726	0	0	0	0
511	0	62	10669.5	0.00	0.00	3.00726e+06	0	0	0	0	0
512	0	68	8437.58	0.00	0.00	1.80436e+06	0	0	0	0	0
513	0	69	6201.6	0.00	0.00	4.81162e+06	0	0	0	0	0
514	0	67	3965.9	0.00	0.00	3.60871e+06	0	0	0	0	0
515	0	58	1731.33	0.00	0.00	4.51089e+06	300726	0	0	0	0
516	1	50	5.21821	0.00	0.00	4.81162e+06	0	0	0	0	0
517	0	40	1.0405	0.00	0.00	902178	2.10508e+06	1.50363e+06	0	300726	0
518	0	34	1426.67	0.00	0.00	1.2029e+06	1.50363e+06	1.80436e+06	300726	0	0
519	0	46	3660.59	0.00	0.00	1.2029e+06	3.00726e+06	300726	0	300726	0
520	0	55	5896.25	0.00	0.00	1.2029e+06	2.40581e+06	2.40581e+06	0	0	0
521	0	46	7647.01	0.00	0.00	1.2029e+06	1.2029e+06	3.60871e+06	0	0	0
522	2	59	9378.43	0.00	0.00	601452	2.40581e+06	1.80436e+06	0	0	0
523	0	59	11285.3	0.00	0.00	300726	1.80436e+06	1.80436e+06	0	902178	0
524	0	45	13296.6	0.00	0.00	0	1.80436e+06	0	300726	601452	2.10508e+06
525	0	44	15369.7	0.00	0.00	0	5.41307e+06	0	300726	0	300726
526	0	27	17483.4	0.00	0.00	0	4.81162e+06	0	0	0	0
527	0	26	19351.8	0.00	0.00	0	4.81162e+06	0	0	0	0
528	0	0	17743.9	0.00	0.00	0	3.90944e+06	0	0	0	0
529	0	0	12019.1	0.00	0.00	0	4.81162e+06	0	0	0	0
530	0	0	12011.2	0.00	0.00	1.2029e+06	300726	1.80436e+06	0	0	300726
531	0	40	12243.5	0.00	0.00	0	0	0	0	300726	0
532	0	50	12167	0.00	0.00	4.51089e+06	300726	902178	0	300726	0
533	0	36	10674.5	0.00	0.00	3.60871e+06	601452	300726	0	300726	0
534	0	41	9463.83	0.00	0.00	4.21016e+06	0	601452	0	0	0
535	0	74	8321.73	0.00	0.00	3.90944e+06	300726	601452	0	0	0
536	0	87	7177.97	0.00	0.00	4.21016e+06	0	601452	0	0	0
537	0	65	5534.7	0.00	0.00	4.51089e+06	0	300726	0	0	0
538	0	52	3332.5	0.00	0.00	0	6.01452e+06	0	0	0	0
539	0	42	1096.3	0.00	0.00	0	3.30799e+06	0	1.50363e+06	0	0
540	0	28	0	0.00	0.00	0	3.60871e+06	0	902178	0	300726
541	0	28	0	0.00	0.00	0	3.00726e+06	0	1.50363e+06	300726	0
542	0	28	0	0.00	0.00	0	2.70653e+06	0	0	0	2.10508e+06
543	0	40	0	0.00	0.00	0	300726	0	300726	0	902178
544	0	40	150.776	0.00	0.00	4.81162e+06	0	0	0	0	0
545	0	50	1765.24	0.00	0.00	4.81162e+06	0	0	0	0	0
546	1	59	3368.76	0.00	0.00	4.81162e+06	0	0	0	0	0
547	2	53	4664.71	0.00	0.00	4.81162e+06	0	0	0	0	0
548	4	53	6264.53	0.00	0.00	4.81162e+06	0	0	0	0	0
549	4	47	8104.75	0.00	0.00	4.81162e+06	0	0	0	0	0
550	4	48	10007.6	0.00	0.00	0	2.10508e+06	0	601452	0	2.10508e+06
551	0	61	11802.7	0.00	0.00	0	4.51089e+06	300726	0	0	0
552	1	48	13706.5	0.00	0.00	0	2.40581e+06	0	902178	0	1.50363e+06
553	0	49	15033.6	0.00	0.00	0	4.81162e+06	0	0	0	0
554	1	49	13107.1	0.00	0.00	0	2.70653e+06	0	601452	0	1.50363e+06
555	2	50	10911.1	0.00	0.00	0	6.01452e+06	0	0	0	0
556	0	57	8736.49	0.00	0.00	0	4.51089e+06	0	0	0	1.50363e+06
557	0	85	6601.02	0.00	0.00	0	4.81162e+06	0	0	0	0
558	0	71	4567.36	0.00	0.00	3.30799e+06	601452	601452	0	300726	0
559	0	37	2835.46	0.00	0.00	4.21016e+06	0	601452	0	0	0
560	3	35	2224.03	0.00	0.00	3.60871e+06	300726	1.50363e+06	0	601452	0
561	0	34	2125.06	0.00	0.00	3.30799e+06	902178	601452	0	0	0
562	0	34	2104.35	0.00	0.00	1.80436e+06	1.50363e+06	902178	0	601452	0
563	0	39	3279.23	0.00	0.00	4.21016e+06	0	601452	0	0	0
564	6	47	4504.92	0.00	0.00	3.60871e+06	601452	300726	0	300726	0
565	0	45	6301.25	0.00	0.00	3.60871e+06	601452	300726	0	0	300726
566	4	44	8316.62	0.00	0.00	3.00726e+06	1.50363e+06	300726	0	0	0
567	0	44	10421	0.00	0.00	3.90944e+06	902178	0	0	0	0
568	0	56	12571.5	0.00	0.00	3.90944e+06	902178	0	0	0	0
569	0	44	14747.2	0.00	0.00	3.60871e+06	1.2029e+06	0	0	0	0
570	0	26	16938.8	0.00	0.00	4.21016e+06	601452	0	0	0	0
571	0	27	18753.7	0.00	0.00	4.81162e+06	0	0	0	0	0
572	0	0	16738	0.00	0.00	5.41307e+06	601452	0	0	0	0
573	0	0	1356.95	0.00	0.00	5.71379e+06	0	300726	0	0	0
574	0	0	2579.39	0.00	0.00	902178	1.80436e+06	300726	0	1.2029e+06	1.80436e+06
575	0	42	14436.1	0.00	0.00	4.51089e+06	0	300726	0	0	0
576	0	36	13078.3	0.00	0.00	1.2029e+06	1.50363e+06	601452	0	1.2029e+06	300726
577	0	36	11001.4	0.00	0.00	0	902178	2.40581e+06	0	1.50363e+06	0
578	0	36	9000.69	0.00	0.00	0	1.2029e+06	902178	0	2.70653e+06	0
579	0	51	7142.72	0.00	0.00	3.30799e+06	300726	902178	300726	0	0
580	0	67	5536.08	0.00	0.00	1.2029e+06	1.80436e+06	1.50363e+06	0	300726	0
581	0	61	4088.69	0.00	0.00	902178	2.40581e+06	1.2029e+06	0	300726	0
582	0	55	3322.92	0.00	0.00	0	2.40581e+06	1.80436e+06	0	300726	300726
583	0	40	1101.35	0.00	0.00	4.81162e+06	0	0	0	0	0
584	0	29	0	0.00	0.00	4.81162e+06	0	0	0	0	0
585	0	28	0	0.00	0.00	4.81162e+06	0	0	0	0	0
586	0	30	0	0.00	0.00	4.81162e+06	0	0	0	0	0
587	0	40	0	0.00	0.00	4.81162e+06	0	0	0	0	0
588	0	43	0	0.00	0.00	2.70653e+06	1.2029e+06	601452	300726	0	0
589	0	41	749.954	0.00	0.00	4.81162e+06	0	0	0	0	0
590	0	40	1519.42	0.00	0.00	1.2029e+06	902178	2.70653e+06	0	0	0
591	1	40	3119.43	0.00	0.00	3.90944e+06	300726	300726	0	300726	0
592	1	35	5114.53	0.00	0.00	3.60871e+06	0	300726	601452	300726	0
593	0	44	6879.82	0.00	0.00	4.81162e+06	0	0	0	0	0
594	0	31	8710.32	0.00	0.00	3.30799e+06	0	601452	0	902178	0
595	0	36	10693.2	0.00	0.00	3.30799e+06	300726	902178	0	300726	0
596	2	43	12762.4	0.00	0.00	4.51089e+06	0	300726	0	0	0
597	0	48	14878.7	0.00	0.00	1.50363e+06	1.2029e+06	2.10508e+06	0	0	0
598	0	41	13161.2	0.00	0.00	2.10508e+06	1.2029e+06	1.2029e+06	0	0	300726
599	0	36	10998.8	0.00	0.00	2.10508e+06	601452	1.2029e+06	0	0	902178
600	0	40	8846.29	0.00	0.00	4.51089e+06	0	300726	0	0	0
601	0	63	6746.06	0.00	0.00	4.81162e+06	0	0	0	0	0
602	2	51	4778.38	0.00	0.00	3.30799e+06	601452	300726	0	601452	0
603	15	34	3157.02	0.00	0.00	4.81162e+06	0	0	0	0	0
604	0	34	1563.23	0.00	0.00	3.30799e+06	0	902178	0	601452	0
605	0	34	875.77	0.00	0.00	3.90944e+06	0	902178	0	0	0
606	0	34	525.458	0.00	0.00	4.51089e+06	0	0	0	300726	0
607	1	41	1336.03	0.00	0.00	3.00726e+06	300726	1.50363e+06	0	0	0
608	2	40	3347.87	0.00	0.00	3.00726e+06	300726	1.2029e+06	0	300726	0
609	0	38	5534.54	0.00	0.00	2.40581e+06	0	2.10508e+06	0	300726	0
610	2	40	7750.29	0.00	0.00	2.70653e+06	300726	902178	300726	300726	300726
611	0	40	9975.09	0.00	0.00	0	2.40581e+06	1.80436e+06	300726	300726	0
612	0	44	12204.1	0.00	0.00	300726	3.30799e+06	1.2029e+06	0	0	0
613	0	36	14435.3	0.00	0.00	902178	2.40581e+06	1.50363e+06	0	0	0
614	0	28	16667.9	0.00	0.00	2.70653e+06	601452	1.50363e+06	0	0	0
615	0	30	18132.8	0.00	0.00	4.51089e+06	0	300726	0	0	0
616	0	40	15974	0.00	0.00	902178	902178	2.10508e+06	300726	601452	0
617	0	0	2051.45	0.00	0.00	5.41307e+06	0	300726	300726	0	0
618	0	0	2174.9	0.00	0.00	6.01452e+06	0	0	0	0	0
619	0	0	1332.38	0.00	0.00	4.51089e+06	0	0	300726	0	0
620	0	25	0	0.00	0.00	4.51089e+06	601452	0	300726	601452	0
621	0	30	822.892	0.00	0.00	4.51089e+06	0	0	300726	0	0
622	0	0	2347.64	0.00	0.00	5.41307e+06	300726	0	0	300726	0
623	0	0	2005.46	0.00	0.00	1.2029e+06	0	0	0	0	0
624	0	0	875.77	0.00	0.00	3.30799e+06	601452	902178	0	0	0
625	0	41	14711	0.00	0.00	902178	1.50363e+06	2.10508e+06	0	0	0
626	0	36	12505.4	0.00	0.00	1.2029e+06	2.40581e+06	1.2029e+06	0	0	0
627	0	36	10313.2	0.00	0.00	601452	902178	2.10508e+06	0	1.2029e+06	0
628	0	36	8144.78	0.00	0.00	1.2029e+06	3.00726e+06	601452	0	0	0
629	0	36	6026.2	0.00	0.00	0	0	0	0	0	0
630	0	36	4035.68	0.00	0.00	0	3.90944e+06	902178	0	0	0
631	0	34	2394.42	0.00	0.00	300726	4.21016e+06	300726	0	0	0
632	0	40	1381.87	0.00	0.00	0	4.51089e+06	0	300726	0	0
633	0	40	1187.98	0.00	0.00	0	4.21016e+06	601452	0	0	0
634	0	37	0	0.00	0.00	3.00726e+06	1.2029e+06	601452	0	0	0
635	0	35	0	0.00	0.00	1.2029e+06	2.10508e+06	601452	0	0	902178
636	0	40	0	0.00	0.00	3.60871e+06	902178	300726	0	0	0
637	0	41	0	0.00	0.00	2.10508e+06	601452	1.80436e+06	0	0	300726
638	0	36	0	0.00	0.00	3.30799e+06	601452	902178	0	0	0
639	0	34	357.207	0.00	0.00	1.2029e+06	1.80436e+06	902178	0	0	902178
640	0	34	625.235	0.00	0.00	3.60871e+06	601452	601452	0	0	0
641	0	38	2150.53	0.00	0.00	0	4.51089e+06	0	300726	0	0
642	4	34	3761.16	0.00	0.00	0	4.81162e+06	0	0	0	0
643	2	40	5713.82	0.00	0.00	0	4.81162e+06	0	0	0	0
644	0	30	7821.85	0.00	0.00	0	4.21016e+06	0	601452	0	0
645	6	28	9984.52	0.00	0.00	0	4.81162e+06	0	0	0	0
646	1	34	12174.4	0.00	0.00	0	3.60871e+06	1.50363e+06	601452	300726	0
647	0	43	14185	0.00	0.00	300726	3.90944e+06	1.2029e+06	601452	0	0
648	0	33	12155.5	0.00	0.00	601452	5.11234e+06	300726	0	0	0
649	0	39	10145.5	0.00	0.00	0	6.01452e+06	0	0	0	0
650	0	47	8222.87	0.00	0.00	0	6.01452e+06	0	0	0	0
651	0	52	6230.59	0.00	0.00	5.41307e+06	0	0	300726	300726	0
652	3	39	4011.41	0.00	0.00	4.51089e+06	0	0	0	300726	0
653	0	37	1831.28	0.00	0.00	4.51089e+06	0	0	300726	0	0
654	2	45	179.397	0.00	0.00	4.21016e+06	0	0	0	601452	0
655	0	28	0	0.00	0.00	4.81162e+06	0	0	0	0	0
656	0	28	0	0.00	0.00	4.51089e+06	0	300726	0	0	0
657	1	40	991.128	0.00	0.00	0	4.81162e+06	0	0	0	0
658	0	29	3227.33	0.00	0.00	300726	4.51089e+06	0	0	0	0
659	0	38	5463.53	0.00	0.00	0	4.81162e+06	0	0	0	0
660	1	40	7699.73	0.00	0.00	0	4.21016e+06	0	300726	0	300726
661	0	29	9935.93	0.00	0.00	0	4.51089e+06	0	300726	0	0
662	0	38	12172.1	0.00	0.00	0	4.81162e+06	0	0	0	0
663	0	37	14408.3	0.00	0.00	0	4.51089e+06	300726	0	0	0
664	0	39	16644.5	0.00	0.00	300726	4.51089e+06	0	0	0	0
665	0	31	17724.2	0.00	0.00	601452	3.90944e+06	300726	0	0	0
666	0	30	15508.5	0.00	0.00	0	4.51089e+06	300726	0	0	0
667	0	0	13299.7	0.00	0.00	0	3.90944e+06	0	300726	0	601452
668	0	0	8923.14	0.00	0.00	0	4.81162e+06	0	0	0	0
669	0	0	4729.15	0.00	0.00	300726	3.90944e+06	300726	0	300726	0
670	0	0	2947.06	0.00	0.00	601452	3.90944e+06	300726	0	0	0
671	0	26	1943.99	0.00	0.00	601452	3.30799e+06	601452	0	0	0
672	0	23	508.2	0.00	0.00	1.2029e+06	3.30799e+06	300726	0	0	0
673	0	27	418.238	0.00	0.00	3.90944e+06	300726	0	0	601452	0
674	0	34	98.4397	0.00	0.00	4.81162e+06	0	0	0	0	0
675	0	40	0	0.00	0.00	4.81162e+06	0	0	0	0	0
676	0	39	1705.96	0.00	0.00	4.81162e+06	0	0	0	0	0
677	0	28	1474.28	0.00	0.00	1.50363e+06	902178	1.50363e+06	0	601452	300726
678	0	32	452.276	0.00	0.00	3.00726e+06	0	902178	0	0	902178
679	0	0	754.253	0.00	0.00	3.00726e+06	601452	1.2029e+06	0	0	0
680	0	0	2252.79	0.00	0.00	1.80436e+06	0	2.40581e+06	0	601452	0
681	0	0	2233.16	0.00	0.00	2.70653e+06	601452	1.2029e+06	0	300726	0
682	0	0	1307.57	0.00	0.00	902178	902178	1.80436e+06	0	902178	300726
683	0	0	1591.46	0.00	0.00	4.81162e+06	0	0	0	0	0
684	0	38	14540.4	0.00	0.00	4.81162e+06	0	0	0	0	0
685	0	40	12304.4	0.00	0.00	4.81162e+06	0	0	0	0	0
686	0	36	10068.6	0.00	0.00	4.81162e+06	0	0	0	0	0
687	0	36	7832.86	0.00	0.00	5.11234e+06	0	0	300726	601452	0
688	0	48	5597.55	0.00	0.00	1.80436e+06	601452	2.10508e+06	0	1.2029e+06	300726
689	0	42	3363.41	0.00	0.00	1.50363e+06	1.50363e+06	2.40581e+06	0	300726	300726
690	0	67	1136.47	0.00	0.00	2.70653e+06	902178	2.40581e+06	0	0	0
691	0	60	0	0.00	0.00	2.10508e+06	902178	1.80436e+06	0	0	0
692	0	58	0	0.00	0.00	3.90944e+06	300726	300726	0	300726	0
693	0	42	0	0.00	0.00	1.80436e+06	1.80436e+06	1.2029e+06	0	0	0
694	0	50	0	0.00	0.00	2.70653e+06	902178	0	300726	0	902178
695	0	43	0	0.00	0.00	4.81162e+06	0	0	0	0	0
696	0	39	39.2942	0.00	0.00	4.81162e+06	0	0	0	0	0
697	0	39	39.2942	0.00	0.00	4.81162e+06	0	0	0	0	0
698	0	34	39.2942	0.00	0.00	0	4.51089e+06	300726	0	0	0
699	0	34	39.2942	0.00	0.00	0	4.21016e+06	300726	300726	0	0
700	0	34	804.259	0.00	0.00	0	4.51089e+06	300726	0	0	0
701	0	40	3027.25	0.00	0.00	0	4.51089e+06	300726	0	0	0
702	0	28	5261	0.00	0.00	0	4.51089e+06	300726	0	0	0
703	0	28	7496.22	0.00	0.00	1.50363e+06	601452	1.50363e+06	0	1.2029e+06	0
704	2	28	9731.88	0.00	0.00	601452	2.70653e+06	902178	0	601452	0
705	0	32	11967.8	0.00	0.00	4.21016e+06	902178	601452	0	300726	0
706	0	46	13590	0.00	0.00	1.50363e+06	2.70653e+06	300726	0	0	1.50363e+06
707	0	39	11438.7	0.00	0.00	2.40581e+06	902178	1.50363e+06	0	300726	902178
708	0	53	9276.48	0.00	0.00	2.70653e+06	902178	2.10508e+06	0	300726	0
709	1	53	7162.36	0.00	0.00	0	2.70653e+06	0	601452	300726	1.2029e+06
710	1	37	5147.61	0.00	0.00	0	4.81162e+06	0	0	0	0
711	5	34	3437.94	0.00	0.00	0	3.90944e+06	0	0	0	0
712	5	46	1915.86	0.00	0.00	0	3.00726e+06	300726	300726	1.2029e+06	0
713	3	30	381.468	0.00	0.00	300726	3.60871e+06	601452	0	300726	0
714	0	31	0	0.00	0.00	0	1.2029e+06	601452	601452	3.60871e+06	0
715	0	38	0	0.00	0.00	601452	300726	3.60871e+06	0	1.50363e+06	0
716	1	31	991.128	0.00	0.00	0	1.2029e+06	4.51089e+06	300726	902178	0
717	0	40	3227.33	0.00	0.00	3.00726e+06	300726	902178	0	0	601452
718	3	40	5463.53	0.00	0.00	3.60871e+06	300726	902178	0	0	0
719	0	28	7699.73	0.00	0.00	3.90944e+06	902178	0	0	0	0
720	0	45	9935.93	0.00	0.00	4.51089e+06	300726	0	0	0	0
721	0	40	12172.1	0.00	0.00	601452	3.30799e+06	902178	0	0	0
722	0	48	14408.3	0.00	0.00	601452	3.90944e+06	300726	0	0	0
723	0	21	16644.5	0.00	0.00	0	3.90944e+06	0	601452	300726	0
724	0	29	17583	0.00	0.00	0	4.81162e+06	0	0	0	0
725	0	24	15346.9	0.00	0.00	0	4.81162e+06	0	0	0	0
726	0	0	13110.9	0.00	0.00	2.70653e+06	0	300726	0	0	0
727	0	24	10875	0.00	0.00	4.81162e+06	0	0	0	0	0
728	0	0	8639.19	0.00	0.00	4.81162e+06	0	0	0	0	0
729	0	34	6403.69	0.00	0.00	4.81162e+06	300726	1.80436e+06	0	300726	300726
730	0	40	4168.96	0.00	0.00	1.50363e+06	2.10508e+06	1.2029e+06	0	0	1.2029e+06
731	0	36	1937.35	0.00	0.00	0	6.01452e+06	0	0	0	0
732	0	31	25.7018	0.00	0.00	0	7.51815e+06	0	0	0	0
733	0	21	0	0.00	0.00	0	1.50363e+06	0	0	0	0
734	1	32	0	0.00	0.00	0	5.41307e+06	0	0	300726	300726
735	0	38	0	0.00	0.00	0	4.51089e+06	0	300726	0	0
736	2	44	1047.37	0.00	0.00	0	1.2029e+06	0	0	300726	300726
737	0	38	1797.74	0.00	0.00	0	3.30799e+06	0	0	300726	0
738	0	34	0	0.00	0.00	0	2.10508e+06	0	0	0	0
739	0	32	0	0.00	0.00	1.50363e+06	300726	300726	0	0	300726
740	0	31	1060.75	0.00	0.00	1.80436e+06	0	300726	300726	0	0
741	0	0	850.04	0.00	0.00	300726	0	300726	0	0	0
742	0	21	1042.05	0.00	0.00	0	3.60871e+06	902178	0	0	300726
743	0	21	1783.5	0.00	0.00	0	3.00726e+06	0	902178	0	902178
744	0	21	18.8807	0.00	0.00	0	3.30799e+06	0	601452	0	902178
745	0	0	0	0.00	0.00	0	3.30799e+06	902178	0	601452	0
746	0	0	466.191	0.00	0.00	1.2029e+06	1.50363e+06	1.80436e+06	0	300726	0
747	0	0	1272.75	0.00	0.00	300726	2.40581e+06	2.10508e+06	0	0	0
748	0	30	14722.8	0.00	0.00	4.21016e+06	0	601452	0	0	0
749	0	33	12519.4	0.00	0.00	2.40581e+06	601452	601452	0	902178	300726
750	0	36	10330.2	0.00	0.00	1.2029e+06	2.10508e+06	1.2029e+06	0	0	300726
751	0	43	8166.25	0.00	0.00	4.21016e+06	601452	0	0	0	0
752	0	40	6055.26	0.00	0.00	4.51089e+06	300726	0	0	0	0
753	0	55	4079.08	0.00	0.00	2.70653e+06	0	0	0	0	0
754	0	66	2444.77	0.00	0.00	4.81162e+06	0	0	0	0	0
755	0	63	943.866	0.00	0.00	3.90944e+06	0	0	0	0	0
756	0	60	0	0.00	0.00	5.71379e+06	300726	0	0	0	0
757	0	60	139.98	0.00	0.00	3.30799e+06	0	0	300726	1.2029e+06	0
758	0	67	496.826	0.00	0.00	3.00726e+06	0	902178	0	902178	0
759	0	59	496.826	0.00	0.00	3.30799e+06	1.50363e+06	1.2029e+06	0	0	0
760	0	65	1755.92	0.00	0.00	4.21016e+06	300726	300726	0	0	0
761	0	58	2275.49	0.00	0.00	1.50363e+06	3.00726e+06	300726	0	0	0
762	0	44	2275.49	0.00	0.00	0	3.60871e+06	1.2029e+06	0	0	0
763	0	39	2275.49	0.00	0.00	300726	3.90944e+06	300726	0	0	300726
764	0	36	2428.5	0.00	0.00	601452	3.00726e+06	300726	300726	0	601452
765	0	35	3807.82	0.00	0.00	0	4.51089e+06	0	300726	0	0
766	0	32	5744.4	0.00	0.00	0	4.51089e+06	300726	0	0	0
767	0	31	7844.23	0.00	0.00	0	4.51089e+06	0	0	0	0
768	0	28	10002	0.00	0.00	0	3.00726e+06	0	0	300726	0
769	1	31	12188.7	0.00	0.00	0	0	0	0	0	0
770	0	34	13358.7	0.00	0.00	0	300726	0	0	0	0
771	0	46	11146.3	0.00	0.00	0	4.21016e+06	0	0	0	601452
772	0	50	8914.04	0.00	0.00	0	1.80436e+06	0	0	0	3.00726e+06
773	4	51	6684.48	0.00	0.00	300726	3.00726e+06	1.2029e+06	0	300726	0
774	0	29	4461.19	0.00	0.00	601452	1.2029e+06	1.50363e+06	0	0	1.2029e+06
775	0	34	2265.26	0.00	0.00	2.70653e+06	1.50363e+06	601452	0	0	0
776	0	34	370.293	0.00	0.00	3.60871e+06	601452	601452	0	0	0
777	0	35	0	0.00	0.00	300726	3.60871e+06	902178	0	0	0
778	0	32	0	0.00	0.00	300726	2.70653e+06	1.2029e+06	0	601452	0
779	0	28	298.093	0.00	0.00	0	3.90944e+06	902178	0	0	0
780	0	31	1736.64	0.00	0.00	902178	3.30799e+06	300726	300726	0	0
781	0	40	3540.52	0.00	0.00	3.30799e+06	1.50363e+06	0	0	0	0
782	10	40	5653.44	0.00	0.00	2.70653e+06	1.2029e+06	902178	0	0	0
783	2	36	7836	0.00	0.00	4.81162e+06	0	0	0	0	0
784	0	34	10041.8	0.00	0.00	4.81162e+06	0	0	0	0	0
785	0	45	12258.8	0.00	0.00	4.21016e+06	0	0	0	601452	0
786	1	53	14481.6	0.00	0.00	3.30799e+06	1.2029e+06	300726	0	0	0
787	0	39	16708	0.00	0.00	2.40581e+06	902178	1.2029e+06	0	0	601452
788	0	41	17734.1	0.00	0.00	0	0	0	0	0	0
789	0	25	15519.8	0.00	0.00	0	4.51089e+06	0	0	0	0
790	0	34	13312.9	0.00	0.00	300726	5.41307e+06	0	0	0	0
791	0	21	11117.6	0.00	0.00	601452	902178	2.10508e+06	0	1.2029e+06	0
792	0	34	8942.75	0.00	0.00	1.80436e+06	300726	1.50363e+06	0	1.2029e+06	0
793	0	33	6807.18	0.00	0.00	0	2.10508e+06	601452	0	2.10508e+06	0
794	0	28	4766.23	0.00	0.00	0	2.70653e+06	1.50363e+06	0	601452	0
795	0	40	2735.81	0.00	0.00	1.2029e+06	0	0	0	0	0
796	0	39	581.701	0.00	0.00	5.71379e+06	300726	0	0	0	0
797	0	26	0	0.00	0.00	4.21016e+06	300726	0	0	0	0
798	1	35	0	0.00	0.00	1.2029e+06	300726	0	0	300726	0
799	0	34	0	0.00	0.00	2.70653e+06	601452	902178	0	0	601452
800	0	52	1248.43	0.00	0.00	1.2029e+06	601452	2.10508e+06	0	300726	601452
801	0	36	1851.38	0.00	0.00	3.00726e+06	1.2029e+06	601452	0	0	0
802	0	34	0	0.00	0.00	0	4.51089e+06	300726	0	0	0
803	0	33	470.581	0.00	0.00	0	2.10508e+06	0	0	0	0
804	0	33	0	0.00	0.00	0	2.10508e+06	0	0	0	0
805	0	27	0	0.00	0.00	0	0	0	0	0	0
806	0	25	436.282	0.00	0.00	902178	0	0	0	0	0
807	0	21	2102.66	0.00	0.00	0	0	0	0	0	0
808	0	21	1206.18	0.00	0.00	1.2029e+06	1.2029e+06	902178	0	1.50363e+06	0
809	0	24	0	0.00	0.00	601452	902178	2.10508e+06	0	1.2029e+06	0
810	0	30	0	0.00	0.00	0	300726	300726	0	0	0
811	0	0	0	0.00	0.00	0	4.51089e+06	300726	0	0	0
812	0	0	0	0.00	0.00	0	4.51089e+06	0	0	300726	0
813	0	0	453.063	0.00	0.00	0	2.70653e+06	0	0	0	0
814	0	30	1968.82	0.00	0.00	2.10508e+06	0	300726	0	300726	0
815	0	32	15225.2	0.00	0.00	4.51089e+06	0	0	0	300726	0
816	0	36	13106.5	0.00	0.00	0	3.60871e+06	0	0	300726	902178
817	6	41	11034.8	0.00	0.00	0	4.81162e+06	0	0	0	0
818	0	47	9041.31	0.00	0.00	3.30799e+06	300726	2.10508e+06	0	300726	0
819	0	41	7193.41	0.00	0.00	3.00726e+06	902178	1.80436e+06	0	300726	0
820	0	65	5590.5	0.00	0.00	0	1.2029e+06	1.50363e+06	0	2.10508e+06	0
821	0	67	3996.89	0.00	0.00	0	902178	0	0	0	0
822	0	71	2349.26	0.00	0.00	3.90944e+06	0	0	300726	601452	0
823	0	67	263.124	0.00	0.00	4.51089e+06	0	0	0	300726	0
824	0	77	1163.57	0.00	0.00	4.81162e+06	0	0	0	0	0
825	0	73	2693.1	0.00	0.00	0	4.21016e+06	601452	0	0	0
826	0	59	2733.03	0.00	0.00	0	0	300726	0	5.71379e+06	0
827	0	59	3195.03	0.00	0.00	3.30799e+06	300726	0	0	0	0
828	0	44	4496.96	0.00	0.00	3.60871e+06	300726	0	0	300726	0
829	0	32	4511.69	0.00	0.00	3.00726e+06	601452	0	0	601452	0
830	0	39	4511.69	0.00	0.00	2.40581e+06	0	0	0	0	0
831	0	33	4588.52	0.00	0.00	0	3.60871e+06	1.2029e+06	0	0	0
832	0	34	5443.17	0.00	0.00	1.2029e+06	2.40581e+06	300726	0	601452	0
833	0	38	6932.29	0.00	0.00	0.902178	0	0	0	0	0
834	0	28	8752.27	0.00	0.00	3.90944e+06	0	0	0	0	0
835	0	33	10727.6	0.00	0.00	0	3.90944e+06	0	0	0	0
836	1	44	12791.3	0.00	0.00	0	4.51089e+06	0	0	300726	0
837	0	46	13226.4	0.00	0.00	0	4.81162e+06	0	0	0	0
838	0	53	11109.6	0.00	0.00	0	1.80436e+06	0	0	0	0
839	2	42	8884.63	0.00	0.00	1.50363e+06	2.40581e+06	601452	0	0	0
840	4	34	6658.27	0.00	0.00	300726	601452	0	0	0	0
841	0	34	4422.07	0.00	0.00	0	300726	0	0	0	0
842	0	29	2185.87	0.00	0.00	0	601452	0	0	601452	300726
843	0	34	0	0.00	0.00	0	0	0	0	0	0
844	0	33	0	0.00	0.00	300726	2.40581e+06	300726	0	1.2029e+06	601452
845	0	30	76.0642	0.00	0.00	0	2.70653e+06	2.10508e+06	0	0	0
846	0	40	1168.43	0.00	0.00	0	1.2029e+06	0	0	0	0
847	0	40	2938.25	0.00	0.00	0	300726	0	0	5.71379e+06	0
848	0	40	4850.67	0.00	0.00	300726	3.30799e+06	902178	300726	0	0
849	0	35	6560.03	0.00	0.00	0	3.30799e+06	601452	0	902178	0
850	0	28	8513.68	0.00	0.00	300726	3.00726e+06	902178	0	601452	0
851	0	44	10578.4	0.00	0.00	4.81162e+06	0	0	0	0	0
852	0	60	12702.2	0.00	0.00	4.81162e+06	300726	601452	0	300726	0
853	0	65	14858.6	0.00	0.00	3.90944e+06	0	601452	300726	0	0
854	0	53	17035.8	0.00	0.00	0	1.2029e+06	1.50363e+06	0	3.30799e+06	0
855	0	41	18153.2	0.00	0.00	300726	4.51089e+06	0	0	0	0
856	0	24	15997.1	0.00	0.00	0	3.30799e+06	0	601452	0	902178
857	0	36	13866.5	0.00	0.00	300726	1.50363e+06	1.80436e+06	300726	0	300726
858	0	38	11771.2	0.00	0.00	0	0	0	0	0	0
859	0	40	9706.21	0.00	0.00	3.90944e+06	0	601452	0	300726	0
860	0	34	7523.55	0.00	0.00	2.10508e+06	1.2029e+06	1.2029e+06	0	300726	0
861	0	31	5386.05	0.00	0.00	601452	3.00726e+06	902178	0	1.50363e+06	0
862	0	37	3370.21	0.00	0.00	0	902178	3.60871e+06	0	300726	0
863	0	32	1490.39	0.00	0.00	0	3.00726e+06	0	0	0	0
864	1	40	9.0787	0.00	0.00	0	4.81162e+06	300726	0	0	0
865	0	46	0	0.00	0.00	300726	1.50363e+06	0	300726	0	0
866	0	53	0	0.00	0.00	0	601452	0	0	0	601452
867	1	26	1248.43	0.00	0.00	5.11234e+06	300726	0	0	601452	0
868	0	34	1851.38	0.00	0.00	0	601452	300726	0	3.90944e+06	0
869	0	37	0	0.00	0.00	0	902178	0	0	3.90944e+06	0
870	0	32	0	0.00	0.00	0	3.60871e+06	300726	0	0	0
871	0	34	457.992	0.00	0.00	0	1.80436e+06	0	300726	2.70653e+06	0
872	0	27	954.358	0.00	0.00	4.81162e+06	0	0	0	0	0
873	0	24	65.024	0.00	0.00	0	300726	0	0	0	0
874	0	33	65.024	0.00	0.00	0	3.30799e+06	0	0	0	0
875	0	36	0	0.00	0.00	0	1.2029e+06	300726	0	0	0
876	0	27	0	0.00	0.00	0	4.81162e+06	300726	0	0	0
877	0	21	0	0.00	0.00	0	2.10508e+06	0	0	0	0
878	0	25	0	0.00	0.00	3.00726e+06	1.50363e+06	601452	0	601452	300726
879	0	0	0	0.00	0.00	0	0	601452	300726	0	0
880	0	0	5.97127	0.00	0.00	1.2029e+06	3.60871e+06	0	0	0	0
881	0	29	1448.45	0.00	0.00	1.80436e+06	1.50363e+06	1.50363e+06	0	0	0
882	0	38	16034.7	0.00	0.00	0	1.2029e+06	1.50363e+06	0	0	0
883	0	34	14038.3	0.00	0.00	0	300726	601452	300726	300726	0
884	0	34	12126.8	0.00	0.00	1.2029e+06	300726	1.2029e+06	0	1.80436e+06	300726
885	4	31	10345	0.00	0.00	0	902178	1.2029e+06	0	2.70653e+06	0
886	0	50	8737.98	0.00	0.00	3.90944e+06	0	0	0	0	0
887	0	68	7136.24	0.00	0.00	0	4.81162e+06	0	0	0	0
888	14	71	5232.25	0.00	0.00	300726	0	0	0	0	0
889	0	79	3383.23	0.00	0.00	2.10508e+06	1.50363e+06	902178	0	0	300726
890	0	84	2341.11	0.00	0.00	0	2.70653e+06	300726	0	1.2029e+06	0
891	0	87	2599.08	0.00	0.00	300726	3.30799e+06	902178	0	300726	0
892	0	85	4107.64	0.00	0.00	3.30799e+06	0	601452	0	902178	0
893	0	75	4969.23	0.00	0.00	0	3.60871e+06	300726	601452	300726	0
894	0	61	5239.65	0.00	0.00	0	1.2029e+06	1.2029e+06	0	300726	0
895	0	48	6297.41	0.00	0.00	0	601452	300726	0	0	300726
896	0	30	6747.89	0.00	0.00	4.51089e+06	300726	0	0	0	0
897	0	34	6747.89	0.00	0.00	300726	0	0	0	0	0
898	0	43	6799.64	0.00	0.00	4.81162e+06	0	0	0	0	0
899	0	32	7406.25	0.00	0.00	1.80436e+06	0	0	0	0	0
900	0	28	8561.11	0.00	0.00	0	0	0	0	0	0
901	0	28	10093.8	0.00	0.00	300726	0	0	0	0	0
902	0	28	11847.1	0.00	0.00	4.81162e+06	0	0	0	0	0
903	0	46	13744.8	0.00	0.00	2.70653e+06	0	0	0	0	0
904	0	46	12668	0.00	0.00	3.30799e+06	0	300726	0	300726	0
905	1	57	10472.8	0.00	0.00	4.51089e+06	0	0	0	300726	0
906	8	50	8298.38	0.00	0.00	4.21016e+06	0	0	0	300726	0
907	0	39	6170.47	0.00	0.00	1.50363e+06	0	0	0	0	0
908	0	29	4149.41	0.00	0.00	1.2029e+06	0	0	0	0	0
909	0	40	2219.01	0.00	0.00	0	0	0	0	0	0
910	0	45	346.019	0.00	0.00	4.81162e+06	0	0	0	0	0
911	0	40	0	0.00	0.00	4.21016e+06	300726	0	0	0	0
912	0	32	947.022	0.00	0.00	601452	0	0	0	0	0
913	0	42	2745.63	0.00	0.00	902178	0	0	0	0	0
914	0	44	4239.97	0.00	0.00	4.81162e+06	0	0	0	0	0
915	0	42	5952.56	0.00	0.00	4.81162e+06	0	0	0	0	0
916	0	32	7892.5	0.00	0.00	4.51089e+06	0	0	0	300726	0
917	0	30	9684.93	0.00	0.00	3.00726e+06	0	0	300726	0	0
918	0	48	11541.9	0.00	0.00	4.81162e+06	0	0	0	0	0
919	0	55	13515.6	0.00	0.00	4.51089e+06	300726	0	0	0	0
920	0	70	15559.7	0.00	0.00	601452	0	0	0	0	0
921	0	67	17650.8	0.00	0.00	5.41307e+06	601452	0	0	0	0
922	0	67	18837.3	0.00	0.00	5.41307e+06	601452	0	0	0	0
923	0	70	16721	0.00	0.00	1.80436e+06	902178	0	0	0	0
924	0	60	14587.8	0.00	0.00	300726	0	0	0	601452	0
925	0	56	12457.6	0.00	0.00	601452	0	300726	0	300726	0
926	0	36	10372.5	0.00	0.00	902178	0	0	0	0	0
927	0	28	8364.79	0.00	0.00	6.01452e+06	0	0	0	0	0
928	0	32	6371.14	0.00	0.00	6.01452e+06	0	0	0	0	0
929	0	40	4382.69	0.00	0.00	6.01452e+06	0	0	0	0	0
930	0	40	2447.3	0.00	0.00	5.71379e+06	0	0	0	300726	0
931	0	53	940.767	0.00	0.00	6.01452e+06	0	0	0	0	0
932	0	55	0	0.00	0.00	5.41307e+06	0	0	0	0	0
933	0	63	0	0.00	0.00	3.90944e+06	0	0	0	0	0
934	0	60	1860.32	0.00	0.00	2.70653e+06	0	0	0	0	0
935	0	23	1971.58	0.00	0.00	2.70653e+06	0	0	0	0	0
936	0	40	522.556	0.00	0.00	902178	0	0	0	0	0
937	0	29	522.556	0.00	0.00	4.51089e+06	300726	0	0	0	0
938	0	31	1969.23	0.00	0.00	4.81162e+06	0	0	0	0	0
939	0	34	2921.51	0.00	0.00	4.21016e+06	601452	0	0	0	0
940	0	35	2301.22	0.00	0.00	4.51089e+06	300726	0	0	0	0
941	0	45	2208.93	0.00	0.00	3.30799e+06	601452	0	0	300726	0
942	0	42	1140.42	0.00	0.00	1.2029e+06	300726	0	300726	300726	0
943	0	23	0	0.00	0.00	902178	0	300726	300726	300726	0
944	0	21	0	0.00	0.00	4.81162e+06	0	0	0	0	0
945	0	0	0	0.00	0.00	2.70653e+06	1.2029e+06	300726	0	601452	0
946	0	0	0	0.00	0.00	2.70653e+06	0	0	0	0	0
947	0	0	1147.85	0.00	0.00	2.40581e+06	300726	0	300726	300726	0
948	0	0	1365.67	0.00	0.00	4.21016e+06	0	0	0	300726	0
949	0	0	366.778	0.00	0.00	4.81162e+06	0	0	0	0	0
950	0	0	366.778	0.00	0.00	4.51089e+06	0	0	0	300726	0
951	0	0	1559.15	0.00	0.00	4.81162e+06	0	0	0	0	0
952	0	29	1256.11	0.00	0.00	4.81162e+06	0	0	0	0	0
953	0	33	17094	0.00	0.00	4.81162e+06	0	0	0	0	0
954	1	33	15236.9	0.00	0.00	4.81162e+06	0	0	0	0	0
955	0	28	13497	0.00	0.00	6.01452e+06	0	0	0	0	0
956	0	40	11901.4	0.00	0.00	4.81162e+06	0	0	0	0	0
957	0	51	10209.5	0.00	0.00	4.21016e+06	0	0	0	601452	0
958	0	65	8276.78	0.00	0.00	4.81162e+06	0	0	0	0	0
959	0	71	6526.1	0.00	0.00	4.21016e+06	0	0	0	601452	0
960	12	74	5166.47	0.00	0.00	2.40581e+06	0	0	300726	0	0
961	0	93	4557.57	0.00	0.00	1.50363e+06	0	0	0	0	0
962	0	93	4694.57	0.00	0.00	0	0	0	0	0	0
963	0	93	5665.43	0.00	0.00	4.81162e+06	0	0	0	0	0
964	0	76	7068.77	0.00	0.00	4.81162e+06	0	0	0	0	0
965	0	54	7393.68	0.00	0.00	4.51089e+06	300726	0	0	0	0
966	0	48	8183.12	0.00	0.00	3.60871e+06	601452	0	300726	300726	0
967	0	47	8981.67	0.00	0.00	4.81162e+06	902178	0	0	300726	0
968	0	35	8984.09	0.00	0.00	3.30799e+06	601452	300726	0	601452	0
969	1	34	9022.9	0.00	0.00	4.21016e+06	601452	0	0	0	0
970	0	28	9487.86	0.00	0.00	3.60871e+06	902178	0	0	300726	0
971	0	28	10412.7	0.00	0.00	2.70653e+06	902178	601452	0	601452	0
972	0	28	11705.3	0.00	0.00	4.51089e+06	0	300726	0	0	0
973	0	31	13245.7	0.00	0.00	4.81162e+06	0	0	0	0	0
974	0	42	14456	0.00	0.00	4.51089e+06	0	0	0	300726	0
975	0	46	12480.8	0.00	0.00	601452	0	300726	0	0	0
976	0	49	10245.3	0.00	0.00	4.21016e+06	300726	0	0	300726	0
977	2	44	8010.16	0.00	0.00	4.51089e+06	0	0	0	300726	0
978	0	47	5775.93	0.00	0.00	4.81162e+06	0	0	0	0	0
979	2	40	3544	0.00	0.00	6.01452e+06	0	0	0	0	0
980	1	41	1326.72	0.00	0.00	4.81162e+06	0	0	0	0	0
981	0	46	90.7538	0.00	0.00	4.81162e+06	0	0	0	0	0
982	0	34	90.7538	0.00	0.00	4.81162e+06	0	0	0	0	0
983	0	42	1001.61	0.00	0.00	4.81162e+06	0	0	0	0	0
984	0	45	3214.19	0.00	0.00	4.81162e+06	0	0	0	0	0
985	0	46	5445.19	0.00	0.00	4.81162e+06	0	0	0	0	0
986	0	45	7364.51	0.00	0.00	902178	0	0	0	0	0
987	1	37	9054.09	0.00	0.00	4.81162e+06	0	0	0	0	0
988	0	34	10926.5	0.00	0.00	4.81162e+06	0	0	0	0	0
989	0	34	12811.7	0.00	0.00	3.30799e+06	1.50363e+06	0	0	0	0
990	0	53	14621.5	0.00	0.00	4.81162e+06	0	0	0	0	0
991	0	65	16529	0.00	0.00	5.11234e+06	902178	0	0	0	0
992	0	69	18510.9	0.00	0.00	3.60871e+06	902178	0	300726	0	0
993	0	73	19523.3	0.00	0.00	3.00726e+06	1.50363e+06	300726	0	0	0
994	0	77	17422.8	0.00	0.00	2.70653e+06	902178	601452	0	601452	0
995	0	78	15360.6	0.00	0.00	4.51089e+06	0	0	0	300726	0
996	0	53	13345.1	0.00	0.00	4.21016e+06	0	0	0	601452	0
997	0	28	11350.8	0.00	0.00	4.81162e+06	0	0	0	0	0
998	0	28	9125.74	0.00	0.00	4.51089e+06	300726	0	0	0	0
999	0	39	6908.04	0.00	0.00	4.81162e+06	0	0	0	0	0
1000	0	41	4707.48	0.00	0.00	4.81162e+06	0	0	0	0	0
1001	2	47	2572.3	0.00	0.00	4.51089e+06	0	0	0	300726	0
1002	1	46	983.523	0.00	0.00	4.51089e+06	300726	0	0	0	0
1003	2	46	0	0.00	0.00	4.81162e+06	0	0	0	0	0
1004	1	68	0	0.00	0.00	4.81162e+06	0	0	0	0	0
1005	0	60	2137.76	0.00	0.00	4.81162e+06	0	0	0	0	0
1006	0	47	3307.44	0.00	0.00	4.81162e+06	0	0	0	0	0
1007	1	33	2758.76	0.00	0.00	6.01452e+06	0	0	0	0	0
1008	0	39	2758.76	0.00	0.00	4.81162e+06	0	0	0	0	0
1009	0	26	3542.17	0.00	0.00	4.81162e+06	0	0	0	0	0
1010	0	21	4865.67	0.00	0.00	4.81162e+06	0	0	0	0	0
1011	0	31	4537.42	0.00	0.00	4.81162e+06	0	0	0	0	0
1012	0	45	3694.23	0.00	0.00	4.81162e+06	0	0	0	0	0
1013	0	45	1673.48	0.00	0.00	4.81162e+06	0	0	0	0	0
1014	0	28	90.7538	0.00	0.00	1.50363e+06	0	0	0	0	0
1015	0	24	90.7538	0.00	0.00	4.81162e+06	0	0	0	0	0
1016	0	0	0	0.00	0.00	4.81162e+06	0	0	0	0	0
1017	0	0	0	0.00	0.00	4.81162e+06	0	0	0	0	0
1018	0	22	0	0.00	0.00	5.11234e+06	902178	0	0	0	0
1019	0	28	350.133	0.00	0.00	3.90944e+06	902178	0	0	0	0
1020	0	32	90.7538	0.00	0.00	3.90944e+06	300726	0	300726	300726	0
1021	1	28	33.1044	0.00	0.00	4.51089e+06	0	0	0	300726	0
1022	0	0	0	0.00	0.00	4.51089e+06	0	0	0	300726	0
1023	0	0	0	0.00	0.00	4.51089e+06	0	0	0	300726	0
1024	0	0	1303.68	0.00	0.00	4.51089e+06	0	0	0	300726	0
1025	0	0	1363.69	0.00	0.00	2.40581e+06	300726	1.80436e+06	0	300726	0
1026	0	0	886.073	0.00	0.00	3.00726e+06	300726	902178	0	601452	0
1027	0	47	1687.91	0.00	0.00	3.60871e+06	601452	0	0	601452	0
1028	0	48	18370.3	0.00	0.00	4.51089e+06	0	0	300726	0	0
1029	0	44	16655.7	0.00	0.00	4.81162e+06	0	0	0	0	0
1030	2	32	15058.3	0.00	0.00	4.81162e+06	0	0	0	0	0
1031	0	50	13256.7	0.00	0.00	4.51089e+06	0	0	0	300726	0
1032	0	59	11393.6	0.00	0.00	4.81162e+06	0	0	0	0	0
1033	0	71	9688.84	0.00	0.00	6.01452e+06	0	0	0	0	0
1034	0	83	8242.6	0.00	0.00	4.81162e+06	0	0	0	0	0
1035	0	86	7211.68	0.00	0.00	4.81162e+06	0	0	0	0	0
1036	0	88	6787.21	0.00	0.00	4.81162e+06	0	0	0	0	0
1037	0	91	6880.5	0.00	0.00	4.81162e+06	0	0	0	0	0
1038	0	93	7577.88	0.00	0.00	4.81162e+06	0	0	0	0	0
1039	0	90	8806.55	0.00	0.00	4.51089e+06	0	0	0	300726	0
1040	0	58	9586.27	0.00	0.00	1.50363e+06	0	0	0	902178	0
1041	0	48	10208.7	0.00	0.00	300726	0	0	0	0	0
1042	0	31	11165.9	0.00	0.00	4.81162e+06	0	0	0	0	0
1043	0	33	11220.3	0.00	0.00	5.11234e+06	902178	0	0	0	0
1044	0	34	11251.4	0.00	0.00	3.60871e+06	902178	0	0	300726	0
1045	0	45	11628.1	0.00	0.00	4.51089e+06	0	0	300726	0	0
1046	0	34	12394.6	0.00	0.00	4.81162e+06	0	0	0	0	0
1047	0	36	13499.8	0.00	0.00	4.51089e+06	0	0	0	300726	0
1048	0	30	14855.2	0.00	0.00	4.51089e+06	0	0	300726	0	0
1049	1	31	14902.9	0.00	0.00	4.81162e+06	0	0	0	0	0
1050	0	46	12699.8	0.00	0.00	3.90944e+06	601452	0	0	300726	0
1051	0	46	10511.3	0.00	0.00	3.30799e+06	300726	601452	0	601452	0
1052	0	56	8346.89	0.00	0.00	3.30799e+06	300726	0	300726	902178	0
1053	0	43	6235.87	0.00	0.00	3.90944e+06	300726	300726	300726	0	0
1054	1	35	4246.98	0.00	0.00	4.51089e+06	0	300726	0	0	0
1055	0	37	2700.22	0.00	0.00	3.60871e+06	0	601452	300726	300726	0
1056	0	45	2326.95	0.00	0.00	4.21016e+06	300726	300726	0	0	0
1057	0	34	2326.95	0.00	0.00	4.81162e+06	0	0	0	0	0
1058	0	43	2534.51	0.00	0.00	4.21016e+06	601452	0	0	0	0
1059	0	46	3982.32	0.00	0.00	4.81162e+06	0	0	0	0	0
1060	0	46	5929.25	0.00	0.00	4.51089e+06	300726	0	0	0	0
1061	0	46	8030.8	0.00	0.00	4.81162e+06	0	0	0	0	0
1062	2	36	10182.6	0.00	0.00	4.81162e+06	0	0	0	0	0
1063	4	34	12175.2	0.00	0.00	6.01452e+06	0	0	0	0	0
1064	0	34	14004.2	0.00	0.00	4.81162e+06	0	0	0	0	0
1065	0	47	15903	0.00	0.00	4.81162e+06	0	0	0	0	0
1066	0	58	17734	0.00	0.00	4.81162e+06	0	0	0	0	0
1067	0	49	19594.7	0.00	0.00	4.81162e+06	0	0	0	0	0
1068	0	48	20312.5	0.00	0.00	4.81162e+06	0	0	0	0	0
1069	0	69	18168.7	0.00	0.00	4.51089e+06	0	0	0	300726	0
1070	0	71	16001.7	0.00	0.00	0	0	0	0	0	0
1071	0	50	13801.9	0.00	0.00	0	300726	0	0	0	0
1072	0	35	11616.1	0.00	0.00	5.41307e+06	601452	0	0	0	0
1073	1	43	9453.78	0.00	0.00	4.81162e+06	0	0	0	0	0
1074	2	46	7336.8	0.00	0.00	4.81162e+06	0	0	0	0	0
1075	0	53	5317.16	0.00	0.00	4.81162e+06	0	0	0	0	0
1076	0	40	3249.7	0.00	0.00	4.51089e+06	0	0	0	300726	0
1077	0	29	1013.5	0.00	0.00	4.51089e+06	0	0	0	300726	0
1078	0	37	0	0.00	0.00	4.81162e+06	0	0	0	0	0
1079	0	59	0	0.00	0.00	4.81162e+06	0	0	0	0	0
1080	0	54	2099.78	0.00	0.00	4.21016e+06	0	0	0	601452	0
1081	0	44	4090.52	0.00	0.00	4.21016e+06	300726	0	0	300726	0
1082	0	68	4994.96	0.00	0.00	3.30799e+06	0	601452	0	902178	0
1083	0	73	4994.96	0.00	0.00	4.81162e+06	0	0	0	0	0
1084	0	58	5471.56	0.00	0.00	4.81162e+06	0	0	0	0	0
1085	0	41	6680.53	0.00	0.00	4.81162e+06	0	0	0	0	0
1086	0	40	6512.61	0.00	0.00	4.51089e+06	300726	0	0	0	0
1087	0	53	4803.7	0.00	0.00	4.81162e+06	0	0	0	0	0
1088	0	52	3236.69	0.00	0.00	4.81162e+06	0	0	0	0	0
1089	0	30	2312.73	0.00	0.00	4.51089e+06	0	0	0	300726	0
1090	0	29	1145.89	0.00	0.00	6.01452e+06	0	0	0	0	0
1091	0	31	0	0.00	0.00	4.81162e+06	0	0	0	0	0
1092	0	29	196.91	0.00	0.00	4.51089e+06	0	0	0	300726	0
1093	0	33	600.46	0.00	0.00	3.90944e+06	0	0	0	902178	0
1094	0	33	1034.36	0.00	0.00	4.21016e+06	300726	0	0	300726	0
1095	0	32	1040.97	0.00	0.00	902178	0	0	0	0	0
1096	2	34	548.286	0.00	0.00	4.81162e+06	0	0	0	0	0
1097	0	36	82.0756	0.00	0.00	4.51089e+06	0	0	0	300726	0
1098	0	40	548.286	0.00	0.00	4.51089e+06	0	0	0	300726	0
1099	0	33	0	0.00	0.00	4.51089e+06	0	0	0	300726	0
1100	0	29	0	0.00	0.00	4.21016e+06	0	300726	0	300726	0
1101	0	32	0	0.00	0.00	4.51089e+06	0	300726	0	0	0
1102	0	46	0	0.00	0.00	4.81162e+06	0	0	0	0	0
1103	0	67	341.048	0.00	0.00	4.51089e+06	0	0	0	300726	0
1104	0	79	19814	0.00	0.00	4.51089e+06	300726	0	0	0	0
1105	0	71	18196.4	0.00	0.00	4.81162e+06	0	0	0	0	0
1106	0	50	16337.3	0.00	0.00	4.21016e+06	0	0	0	601452	0
1107	1	46	14524.7	0.00	0.00	3.90944e+06	0	0	300726	601452	0
1108	0	69	12847.4	0.00	0.00	4.51089e+06	0	0	0	300726	0
1109	1	74	11363.2	0.00	0.00	4.81162e+06	0	0	0	0	0
1110	0	81	10159.2	0.00	0.00	4.51089e+06	0	0	0	300726	0
1111	0	77	9343.06	0.00	0.00	6.01452e+06	0	0	0	0	0
1112	0	84	9020.02	0.00	0.00	4.81162e+06	0	0	0	0	0
1113	0	73	9090.35	0.00	0.00	4.81162e+06	0	0	0	0	0
1114	0	83	9628.09	0.00	0.00	3.30799e+06	0	300726	0	1.2029e+06	0
1115	0	84	10621.6	0.00	0.00	3.00726e+06	0	601452	0	1.2029e+06	0
1116	0	66	11754.7	0.00	0.00	300726	0	300726	0	0	0
1117	0	44	12305.8	0.00	0.00	0	0	0	0	0	0
1118	0	30	13176.7	0.00	0.00	300726	0	300726	0	300726	0
1119	0	33	13456.5	0.00	0.00	300726	0	0	0	0	0
1120	0	34	13482.4	0.00	0.00	4.81162e+06	0	0	0	0	0
1121	0	37	13798.2	0.00	0.00	4.51089e+06	300726	0	0	0	0
1122	0	33	14449.5	0.00	0.00	4.81162e+06	0	0	0	0	0
1123	0	36	15407.9	0.00	0.00	4.51089e+06	0	0	0	300726	0
1124	0	40	16607.6	0.00	0.00	4.51089e+06	0	0	0	300726	0
1125	0	40	15408.3	0.00	0.00	4.81162e+06	0	0	0	0	0
1126	0	46	13288.8	0.00	0.00	4.21016e+06	0	0	0	601452	0
1127	0	46	11216.7	0.00	0.00	3.90944e+06	0	300726	0	601452	0
1128	0	58	9217.94	0.00	0.00	4.81162e+06	0	0	0	0	0
1129	0	56	7364.18	0.00	0.00	4.81162e+06	0	0	0	0	0
1130	0	40	5774.78	0.00	0.00	3.90944e+06	0	300726	0	601452	0
1131	0	41	4763.47	0.00	0.00	3.30799e+06	601452	300726	0	601452	0
1132	0	46	4563.15	0.00	0.00	4.21016e+06	0	0	0	601452	0
1133	0	34	4563.15	0.00	0.00	4.51089e+06	0	0	0	300726	0
1134	0	39	4670.65	0.00	0.00	4.81162e+06	0	0	0	0	0
1135	0	40	5588.32	0.00	0.00	4.81162e+06	0	0	0	0	0
1136	0	40	7104.41	0.00	0.00	4.51089e+06	0	300726	0	0	0
1137	0	40	8934.54	0.00	0.00	4.81162e+06	0	0	0	0	0
1138	0	35	10914.3	0.00	0.00	4.81162e+06	0	0	0	0	0
1139	5	28	12979.1	0.00	0.00	3.00726e+06	0	1.50363e+06	0	300726	0
1140	0	46	15092.1	0.00	0.00	902178	0	300726	0	0	0
1141	0	45	17094.9	0.00	0.00	300726	300726	902178	0	601452	0
1142	4	40	18976.6	0.00	0.00	3.90944e+06	0	601452	0	300726	0
1143	7	35	20853.5	0.00	0.00	1.80436e+06	0	300726	0	300726	0
1144	3	36	20266.9	0.00	0.00	0	0	0	0	0	0
1145	0	42	18032.8	0.00	0.00	4.21016e+06	0	0	0	601452	0
1146	0	57	15799.3	0.00	0.00	4.51089e+06	0	0	0	300726	0
1147	2	42	13566.7	0.00	0.00	4.81162e+06	0	0	0	0	0
1148	3	43	11335.6	0.00	0.00	4.51089e+06	0	0	0	300726	0
1149	0	46	9106.83	0.00	0.00	4.81162e+06	0	0	0	0	0
1150	0	40	6883.04	0.00	0.00	4.51089e+06	0	300726	0	0	0
1151	0	40	4670.98	0.00	0.00	4.81162e+06	0	0	0	0	0
1152	0	25	2505.51	0.00	0.00	4.51089e+06	300726	0	0	0	0
1153	0	29	833.81	0.00	0.00	4.81162e+06	0	0	0	0	0
1154	0	34	0	0.00	0.00	3.60871e+06	0	300726	300726	601452	0
1155	0	24	0	0.00	0.00	3.60871e+06	300726	0	0	902178	0
1156	0	38	1220.87	0.00	0.00	3.90944e+06	300726	0	0	601452	0
1157	0	46	3096.98	0.00	0.00	4.51089e+06	300726	0	0	0	0
1158	0	58	5119.61	0.00	0.00	4.21016e+06	0	300726	0	300726	0
1159	0	70	7086.43	0.00	0.00	4.51089e+06	0	0	0	300726	0
1160	0	45	7567.63	0.00	0.00	4.81162e+06	0	0	0	0	0
1161	0	39	8480.04	0.00	0.00	2.40581e+06	1.2029e+06	601452	0	601452	0
1162	0	28	7961.22	0.00	0.00	4.81162e+06	0	0	0	0	0
1163	0	39	6309.73	0.00	0.00	3.90944e+06	0	902178	0	0	0
1164	0	26	4744.86	0.00	0.00	4.81162e+06	0	0	0	0	0
1165	0	21	2619.42	0.00	0.00	4.21016e+06	0	601452	0	0	0
1166	0	21	487.264	0.00	0.00	902178	0	601452	0	300726	0
1167	0	27	0	0.00	0.00	3.60871e+06	0	902178	0	0	0
1168	0	33	0	0.00	0.00	4.51089e+06	0	0	300726	0	0
1169	0	40	0	0.00	0.00	0	0	0	0	0	0
1170	0	46	0	0.00	0.00	4.51089e+06	0	0	0	300726	0
1171	0	41	987.803	0.00	0.00	4.81162e+06	0	0	0	0	0
1172	0	39	2261.95	0.00	0.00	4.21016e+06	0	0	0	601452	0
1173	0	43	773.642	0.00	0.00	4.51089e+06	0	0	0	300726	0
1174	1	45	116.484	0.00	0.00	4.81162e+06	0	0	0	0	0
1175	0	43	0	0.00	0.00	4.81162e+06	0	0	0	0	0
1176	2	38	80.7339	0.00	0.00	4.81162e+06	0	0	0	0	0
1177	0	44	1005.82	0.00	0.00	3.60871e+06	0	0	0	1.2029e+06	0
1178	0	56	1005.82	0.00	0.00	4.21016e+06	0	0	0	601452	0
1179	2	65	989.681	0.00	0.00	4.51089e+06	0	0	0	300726	0
1180	0	63	21294.6	0.00	0.00	6.01452e+06	0	0	0	0	0
1181	0	40	19446.9	0.00	0.00	4.51089e+06	0	0	0	300726	0
1182	0	35	17671.1	0.00	0.00	4.21016e+06	0	300726	0	300726	0
1183	3	36	16009.8	0.00	0.00	4.51089e+06	0	0	0	300726	0
1184	7	45	14505.1	0.00	0.00	3.60871e+06	300726	300726	0	601452	0
1185	0	46	13208	0.00	0.00	4.81162e+06	0	0	0	0	0
1186	0	68	12187.1	0.00	0.00	4.51089e+06	300726	0	0	0	0
1187	0	72	11515	0.00	0.00	4.21016e+06	0	300726	0	300726	0
1188	0	80	11254.2	0.00	0.00	4.51089e+06	300726	0	0	0	0
1189	0	72	11310.7	0.00	0.00	3.30799e+06	601452	300726	0	601452	0
1190	1	84	11747.6	0.00	0.00	1.2029e+06	601452	300726	0	1.80436e+06	902178
1191	0	79	12575.4	0.00	0.00	3.60871e+06	0	300726	0	902178	0
1192	0	68	13719	0.00	0.00	3.30799e+06	300726	902178	0	300726	0
1193	0	46	14445.5	0.00	0.00	3.90944e+06	0	601452	0	300726	0
1194	0	51	15194.4	0.00	0.00	3.60871e+06	0	1.2029e+06	0	0	0
1195	0	36	15692.7	0.00	0.00	3.00726e+06	300726	1.50363e+06	0	0	0
1196	0	35	15714.9	0.00	0.00	4.21016e+06	0	601452	0	0	0
1197	0	37	15986.8	0.00	0.00	0	0	300726	0	0	0
1198	0	39	16552.4	0.00	0.00	0	0	601452	0	0	0
1199	0	31	17395.7	0.00	0.00	0	0	0	0	0	0
1200	0	30	18207.7	0.00	0.00	601452	0	0	0	0	0
1201	0	31	16214.5	0.00	0.00	4.21016e+06	0	0	0	601452	0
1202	0	42	14215	0.00	0.00	3.60871e+06	300726	0	0	902178	0
1203	0	42	12300.6	0.00	0.00	4.81162e+06	0	0	0	0	0
1204	0	58	10508.1	0.00	0.00	4.21016e+06	300726	0	0	300726	0
1205	0	59	8927.7	0.00	0.00	4.81162e+06	0	0	0	0	0
1206	0	40	7666.08	0.00	0.00	4.81162e+06	0	0	0	0	0
1207	0	41	6936.03	0.00	0.00	4.81162e+06	0	0	0	0	0
1208	0	46	6799.35	0.00	0.00	4.81162e+06	0	0	0	0	0
1209	0	40	6799.35	0.00	0.00	4.21016e+06	0	0	0	601452	0
1210	0	40	6872.17	0.00	0.00	6.01452e+06	0	0	0	0	0
1211	0	40	7528.11	0.00	0.00	4.51089e+06	0	0	0	300726	0
1212	0	40	8713.19	0.00	0.00	4.51089e+06	0	0	0	300726	0
1213	0	40	10261.9	0.00	0.00	3.60871e+06	300726	300726	0	300726	300726
1214	0	40	12024.9	0.00	0.00	4.81162e+06	0	0	0	0	0
1215	0	32	13926.5	0.00	0.00	4.81162e+06	0	0	0	0	0
1216	4	34	15914.1	0.00	0.00	4.51089e+06	0	0	0	0	300726
1217	1	44	17961	0.00	0.00	3.90944e+06	300726	300726	0	300726	0
1218	1	40	20043.7	0.00	0.00	300726	3.30799e+06	0	0	300726	902178
1219	3	39	21964.9	0.00	0.00	1.50363e+06	300726	1.50363e+06	0	1.2029e+06	300726
1220	0	30	20269.5	0.00	0.00	3.00726e+06	300726	1.2029e+06	0	300726	0
1221	0	32	18035.7	0.00	0.00	3.30799e+06	300726	902178	0	300726	0
1222	0	32	15802.6	0.00	0.00	4.51089e+06	0	300726	0	0	0
1223	0	34	13570.6	0.00	0.00	3.90944e+06	0	902178	0	0	0
1224	3	34	11340.1	0.00	0.00	4.81162e+06	0	0	0	0	0
1225	0	34	9112.53	0.00	0.00	4.21016e+06	0	300726	0	0	300726
1226	1	40	6890.62	0.00	0.00	3.90944e+06	300726	300726	0	300726	0
1227	0	29	4682.19	0.00	0.00	3.00726e+06	0	1.50363e+06	0	0	0
1228	0	25	2527.39	0.00	0.00	3.30799e+06	601452	1.2029e+06	0	300726	0
1229	1	33	940.767	0.00	0.00	2.40581e+06	0	2.10508e+06	0	0	0
1230	0	34	0	0.00	0.00	0	0	0	0	0	0
1231	0	33	0	0.00	0.00	0	0	0	0	0	0
1232	0	31	359.092	0.00	0.00	1.2029e+06	0	0	0	0	0
1233	1	34	2595.29	0.00	0.00	4.51089e+06	0	0	0	300726	0
1234	0	40	4831.49	0.00	0.00	4.51089e+06	0	0	0	300726	0
1235	0	38	6553.79	0.00	0.00	4.21016e+06	300726	0	0	300726	0
1236	2	46	7242.23	0.00	0.00	4.81162e+06	0	0	0	0	0
1237	0	43	8432.62	0.00	0.00	4.81162e+06	0	0	0	0	0
1238	0	43	8473.64	0.00	0.00	4.81162e+06	0	0	0	0	0
1239	0	34	6243.29	0.00	0.00	4.21016e+06	0	0	0	601452	0
1240	0	34	4019.83	0.00	0.00	4.81162e+06	0	0	0	0	0
1241	0	21	1824.8	0.00	0.00	4.51089e+06	0	0	0	300726	0
1242	0	21	142.387	0.00	0.00	6.01452e+06	0	0	0	0	0
1243	0	21	0	0.00	0.00	4.81162e+06	0	0	0	0	0
1244	0	27	0	0.00	0.00	4.81162e+06	0	0	0	0	0
1245	0	34	0	0.00	0.00	4.81162e+06	0	0	0	0	0
1246	0	45	0	0.00	0.00	2.70653e+06	902178	300726	0	902178	0
1247	0	46	996.733	0.00	0.00	1.2029e+06	1.80436e+06	0	0	601452	1.2029e+06
1248	0	44	572.345	0.00	0.00	902178	601452	1.80436e+06	0	300726	1.2029e+06
1249	0	36	85.9272	0.00	0.00	3.30799e+06	300726	1.2029e+06	0	0	0
1250	0	42	783.438	0.00	0.00	3.30799e+06	1.2029e+06	300726	0	0	0
1251	0	37	0	0.00	0.00	2.40581e+06	1.50363e+06	601452	0	300726	0
1252	0	35	616.391	0.00	0.00	4.21016e+06	0	601452	0	0	0
1253	0	35	2296.97	0.00	0.00	3.60871e+06	601452	601452	0	0	0
1254	0	0	3242.02	0.00	0.00	4.81162e+06	0	0	0	0	0
1255	0	58	1728.04	0.00	0.00	4.81162e+06	0	0	0	0	0
1256	0	57	989.357	0.00	0.00	1.80436e+06	1.2029e+06	1.2029e+06	300726	300726	0
1257	0	33	22569.6	0.00	0.00	3.60871e+06	0	1.2029e+06	0	0	0
1258	0	32	20819	0.00	0.00	4.81162e+06	0	0	0	0	0
1259	0	35	19170.9	0.00	0.00	4.51089e+06	902178	601452	0	0	0
1260	0	28	17651.4	0.00	0.00	1.80436e+06	1.2029e+06	601452	0	0	1.2029e+06
1261	0	34	16299.3	0.00	0.00	1.2029e+06	1.2029e+06	601452	0	601452	902178
1262	0	34	15156.8	0.00	0.00	300726	0	0	0	0	0
1263	0	53	14276.3	0.00	0.00	2.70653e+06	0	0	0	0	0
1264	0	59	13707.2	0.00	0.00	4.81162e+06	0	0	0	1.2029e+06	0
1265	0	68	13489	0.00	0.00	6.01452e+06	0	0	0	0	0
1266	0	79	13536.2	0.00	0.00	5.71379e+06	0	0	0	300726	0
1267	0	79	13903.1	0.00	0.00	5.71379e+06	0	0	0	300726	0
1268	0	71	14609.1	0.00	0.00	5.41307e+06	601452	0	0	0	0
1269	0	59	15603.9	0.00	0.00	6.01452e+06	0	0	0	0	0
1270	0	59	16610.2	0.00	0.00	6.01452e+06	0	0	0	0	0
1271	0	59	17265.2	0.00	0.00	7.51815e+06	0	0	0	0	0
1272	0	50	17928.9	0.00	0.00	5.71379e+06	300726	0	0	0	0
1273	0	31	17948.4	0.00	0.00	3.30799e+06	300726	2.10508e+06	0	300726	0
1274	0	40	18186.8	0.00	0.00	6.01452e+06	0	0	0	0	0
1275	0	39	18685.7	0.00	0.00	4.21016e+06	601452	300726	0	0	902178
1276	0	35	19436.6	0.00	0.00	5.71379e+06	300726	0	0	0	0
1277	0	34	19210.2	0.00	0.00	0	1.2029e+06	0	0	0	601452
1278	0	30	17270.3	0.00	0.00	3.60871e+06	0	0	0	0	0
1279	0	28	15408	0.00	0.00	4.51089e+06	300726	0	0	0	0
1280	0	37	13662.7	0.00	0.00	3.90944e+06	0	0	0	902178	0
1281	0	58	12073.5	0.00	0.00	4.21016e+06	0	0	0	601452	0
1282	0	58	10728.1	0.00	0.00	4.51089e+06	0	0	0	300726	0
1283	0	46	9703.29	0.00	0.00	4.81162e+06	0	0	0	0	0
1284	0	40	9138.74	0.00	0.00	4.81162e+06	0	0	0	0	0
1285	0	46	9035.55	0.00	0.00	4.81162e+06	0	0	0	0	0
1286	0	38	9035.55	0.00	0.00	6.01452e+06	0	0	0	0	0
1287	0	40	9090.38	0.00	0.00	4.81162e+06	0	0	0	0	0
1288	0	48	9595.44	0.00	0.00	601452	1.80436e+06	601452	300726	300726	1.2029e+06
1289	0	47	10549.6	0.00	0.00	601452	1.80436e+06	2.40581e+06	0	0	0
1290	0	46	11861	0.00	0.00	2.40581e+06	601452	1.80436e+06	0	0	0
1291	0	40	13414.6	0.00	0.00	2.10508e+06	902178	601452	0	0	1.2029e+06
1292	0	35	15142.9	0.00	0.00	300726	2.10508e+06	601452	0	300726	1.50363e+06
1293	2	46	16988.4	0.00	0.00	1.50363e+06	2.10508e+06	601452	0	0	601452
1294	0	46	18919.5	0.00	0.00	902178	601452	3.00726e+06	0	0	300726
1295	0	40	20910.8	0.00	0.00	4.21016e+06	0	601452	0	0	0
1296	0	40	22035	0.00	0.00	3.90944e+06	902178	902178	300726	0	0
1297	0	40	20077.6	0.00	0.00	1.80436e+06	1.2029e+06	1.80436e+06	0	0	0
1298	0	38	17967.8	0.00	0.00	601452	2.40581e+06	1.50363e+06	0	0	300726
1299	1	45	15765.8	0.00	0.00	2.40581e+06	1.80436e+06	601452	0	0	0
1300	0	39	13541.4	0.00	0.00	0	2.40581e+06	1.50363e+06	0	601452	300726
1301	0	34	11305.2	0.00	0.00	300726	2.70653e+06	1.2029e+06	0	0	601452
1302	0	37	9068.97	0.00	0.00	0	3.30799e+06	1.2029e+06	0	0	300726
1303	0	40	6832.77	0.00	0.00	1.2029e+06	1.2029e+06	902178	0	0	1.50363e+06
1304	0	37	4596.57	0.00	0.00	1.2029e+06	0	2.40581e+06	0	902178	1.50363e+06
1305	1	21	2360.37	0.00	0.00	4.81162e+06	0	0	0	0	0
1306	2	27	124.17	0.00	0.00	4.81162e+06	0	0	0	0	0
1307	1	34	0	0.00	0.00	4.51089e+06	0	300726	0	0	0
1308	0	21	0	0.00	0.00	0	0	0	0	1.2029e+06	1.2029e+06
1309	1	21	359.092	0.00	0.00	0	0	300726	0	0	0
1310	1	21	2371.02	0.00	0.00	601452	601452	1.2029e+06	0	0	0
1311	0	40	3670.29	0.00	0.00	902178	601452	1.50363e+06	0	0	0
1312	0	40	4391.11	0.00	0.00	0	2.70653e+06	601452	0	0	902178
1313	2	24	5307.96	0.00	0.00	300726	300726	902178	0	0	0
1314	0	32	6825.33	0.00	0.00	0	601452	0	0	0	300726
1315	0	38	8006.52	0.00	0.00	3.60871e+06	0	0	0	902178	0
1316	0	34	6179.45	0.00	0.00	3.30799e+06	0	300726	0	902178	300726
1317	0	31	3984.66	0.00	0.00	4.51089e+06	0	0	0	300726	0
1318	0	21	1748.46	0.00	0.00	4.81162e+06	0	0	0	0	0
1319	0	21	0	0.00	0.00	4.51089e+06	300726	0	0	0	0
1320	0	21	0	0.00	0.00	4.81162e+06	0	0	0	0	0
1321	0	23	0	0.00	0.00	4.51089e+06	0	0	0	300726	0
1322	0	33	0	0.00	0.00	4.81162e+06	0	0	0	0	0
1323	0	46	0	0.00	0.00	6.01452e+06	0	0	0	0	0
1324	0	46	996.733	0.00	0.00	4.81162e+06	0	0	0	0	0
1325	0	29	1156.68	0.00	0.00	2.70653e+06	601452	0	0	601452	902178
1326	0	29	1929.99	0.00	0.00	601452	1.2029e+06	601452	1.2029e+06	0	1.2029e+06
1327	0	38	2064.34	0.00	0.00	902178	2.10508e+06	902178	0	300726	601452
1328	0	40	116.81	0.00	0.00	601452	1.50363e+06	1.80436e+06	0	0	902178
1329	0	46	0	0.00	0.00	2.70653e+06	300726	1.50363e+06	300726	0	0
1330	0	0	1963.26	0.00	0.00	1.2029e+06	902178	1.50363e+06	0	300726	902178
1331	0	0	4199.46	0.00	0.00	2.10508e+06	1.2029e+06	601452	0	601452	300726
1332	0	0	3239.72	0.00	0.00	300726	2.40581e+06	1.50363e+06	0	0	601452
1333	0	56	2914.41	0.00	0.00	4.21016e+06	300726	300726	0	0	0
1334	0	58	25702.8	0.00	0.00	3.60871e+06	300726	1.2029e+06	0	902178	0
1335	0	41	23973.5	0.00	0.00	300726	2.10508e+06	2.40581e+06	0	0	0
1336	1	39	22333	0.00	0.00	300726	2.70653e+06	1.2029e+06	0	601452	0
1337	1	40	20805.3	0.00	0.00	1.80436e+06	601452	1.80436e+06	0	601452	0
1338	0	28	19413.9	0.00	0.00	3.00726e+06	1.2029e+06	300726	0	300726	0
1339	0	34	18193.1	0.00	0.00	4.81162e+06	0	0	0	0	0
1340	0	35	17176.7	0.00	0.00	3.60871e+06	300726	0	0	0	902178
1341	0	53	16404.8	0.00	0.00	300726	2.10508e+06	1.80436e+06	0	300726	300726
1342	0	59	15911.9	0.00	0.00	3.00726e+06	300726	1.2029e+06	0	0	300726
1343	0	46	15724.3	0.00	0.00	2.10508e+06	601452	1.2029e+06	0	300726	601452
1344	0	61	15764.8	0.00	0.00	300726	2.10508e+06	2.10508e+06	0	0	300726
1345	0	58	16081	0.00	0.00	3.30799e+06	0	2.70653e+06	0	0	0
1346	0	59	16695.4	0.00	0.00	4.51089e+06	0	300726	0	0	0
1347	0	59	17572.6	0.00	0.00	4.21016e+06	0	601452	0	0	0
1348	0	59	18651.7	0.00	0.00	601452	902178	2.10508e+06	0	902178	0
1349	0	59	19373.3	0.00	0.00	0	0	601452	0	0	0
1350	0	57	20094.8	0.00	0.00	0	0	0	0	0	0
1351	0	40	20182.4	0.00	0.00	0	0	0	0	0	0
1352	0	29	20394.8	0.00	0.00	0	0	300726	0	0	0
1353	0	33	20841	0.00	0.00	3.60871e+06	300726	902178	0	0	0
1354	0	46	21517	0.00	0.00	3.30799e+06	902178	601452	0	0	0
1355	0	37	20359	0.00	0.00	601452	2.40581e+06	1.50363e+06	0	0	300726
1356	0	34	18539.9	0.00	0.00	601452	1.50363e+06	601452	300726	0	1.80436e+06
1357	0	29	16818.1	0.00	0.00	0	0	300726	0	0	0
1358	0	35	15235.7	0.00	0.00	0	0	0	0	0	0
1359	0	56	13827.3	0.00	0.00	0	0	0	0	0	0
1360	0	59	12669.9	0.00	0.00	300726	0	300726	0	0	0
1361	0	46	11813.9	0.00	0.00	4.51089e+06	0	300726	0	0	0
1362	0	46	11354.7	0.00	0.00	4.21016e+06	300726	0	0	300726	0
1363	0	47	11271.8	0.00	0.00	4.81162e+06	0	0	0	0	0
1364	0	59	11271.8	0.00	0.00	4.81162e+06	0	0	0	0	0
1365	0	53	11315.8	0.00	0.00	4.51089e+06	0	0	0	0	300726
1366	0	53	11725.7	0.00	0.00	3.00726e+06	300726	902178	0	0	601452
1367	0	53	12518.8	0.00	0.00	5.71379e+06	300726	0	0	0	0
1368	0	53	13642.8	0.00	0.00	0	4.21016e+06	300726	300726	0	0
1369	0	41	15013.2	0.00	0.00	300726	2.10508e+06	1.2029e+06	0	0	1.2029e+06
1370	0	41	16576	0.00	0.00	2.70653e+06	0	1.2029e+06	0	601452	300726
1371	0	56	18277.4	0.00	0.00	4.81162e+06	0	0	0	0	0
1372	0	43	20085.1	0.00	0.00	2.10508e+06	1.50363e+06	902178	300726	0	0
1373	0	40	21971	0.00	0.00	4.51089e+06	0	300726	0	0	0
1374	0	40	21462.1	0.00	0.00	3.90944e+06	601452	1.50363e+06	0	0	0
1375	0	40	19313.4	0.00	0.00	0	2.40581e+06	2.10508e+06	0	300726	0
1376	0	42	17187.1	0.00	0.00	0	2.40581e+06	1.80436e+06	0	300726	300726
1377	2	46	15092.6	0.00	0.00	2.10508e+06	601452	1.80436e+06	0	300726	0
1378	0	40	13045	0.00	0.00	2.70653e+06	1.50363e+06	0	0	300726	300726
1379	2	40	11046.1	0.00	0.00	4.81162e+06	0	0	0	0	0
1380	0	40	8969.02	0.00	0.00	3.60871e+06	300726	902178	0	0	0
1381	4	35	6832.77	0.00	0.00	1.2029e+06	902178	1.80436e+06	902178	0	0
1382	1	34	4596.57	0.00	0.00	3.90944e+06	0	902178	0	0	0
1383	0	34	2360.37	0.00	0.00	300726	2.40581e+06	1.50363e+06	0	300726	300726
1384	0	34	124.17	0.00	0.00	601452	1.2029e+06	3.00726e+06	0	0	0
1385	0	28	333.362	0.00	0.00	3.00726e+06	0	3.00726e+06	0	0	0
1386	0	25	599.745	0.00	0.00	3.90944e+06	300726	0	0	601452	0
1387	0	23	0	0.00	0.00	4.21016e+06	300726	300726	0	0	0
1388	0	28	1155.25	0.00	0.00	3.30799e+06	0	902178	0	601452	0
1389	1	39	1721.96	0.00	0.00	4.21016e+06	0	0	0	300726	0
1390	0	33	2246.87	0.00	0.00	2.40581e+06	300726	0	300726	300726	0
1391	0	26	3668.67	0.00	0.00	2.10508e+06	0	1.80436e+06	0	0	601452
1392	0	26	5334.29	0.00	0.00	601452	1.50363e+06	902178	0	601452	300726
1393	0	46	7059.76	0.00	0.00	6.01452e+06	0	0	0	0	0
1394	0	39	5475.29	0.00	0.00	4.51089e+06	300726	0	0	0	0
1395	2	22	3338.16	0.00	0.00	1.50363e+06	1.80436e+06	902178	0	0	601452
1396	0	21	1409.07	0.00	0.00	4.21016e+06	300726	300726	0	0	0
1397	0	21	0	0.00	0.00	2.40581e+06	902178	1.50363e+06	0	0	0
1398	0	21	0	0.00	0.00	902178	601452	2.40581e+06	0	0	0
1399	0	25	0	0.00	0.00	1.50363e+06	0	902178	0	0	601452
1400	0	33	0	0.00	0.00	2.70653e+06	601452	902178	0	0	300726
1401	0	45	0	0.00	0.00	4.81162e+06	0	0	0	0	0
1402	0	46	1232.25	0.00	0.00	4.51089e+06	0	300726	0	0	0
1403	0	39	3084.48	0.00	0.00	2.70653e+06	0	0	0	0	0
1404	0	32	3717.37	0.00	0.00	601452	300726	902178	0	300726	0
1405	0	39	2422.29	0.00	0.00	4.21016e+06	0	601452	0	0	0
1406	0	45	730.476	0.00	0.00	4.21016e+06	0	300726	0	300726	0
1407	0	46	0	0.00	0.00	3.00726e+06	0	1.80436e+06	0	0	0
1408	0	40	1963.26	0.00	0.00	4.21016e+06	300726	0	0	300726	0
1409	0	0	4199.46	0.00	0.00	4.81162e+06	0	0	0	0	0
1410	0	0	5298.71	0.00	0.00	2.40581e+06	902178	1.50363e+06	0	0	0
1411	0	43	5105.22	0.00	0.00	1.50363e+06	2.70653e+06	300726	300726	300726	902178
1412	0	53	28842.2	0.00	0.00	4.81162e+06	0	0	0	0	0
1413	0	42	27127.5	0.00	0.00	4.81162e+06	0	0	0	0	0
1414	1	39	25495.2	0.00	0.00	4.81162e+06	0	0	0	0	0
1415	0	40	23959	0.00	0.00	300726	300726	1.50363e+06	601452	601452	1.50363e+06
1416	0	40	22541.9	0.00	0.00	601452	902178	1.2029e+06	300726	300726	1.50363e+06
1417	0	29	21264.5	0.00	0.00	4.81162e+06	0	0	0	0	0
1418	0	34	20156.3	0.00	0.00	4.81162e+06	0	0	0	0	0
1419	0	44	19243.9	0.00	0.00	4.21016e+06	300726	300726	0	0	0
1420	0	53	18558.4	0.00	0.00	1.2029e+06	2.10508e+06	2.40581e+06	0	300726	0
1421	0	46	18124.2	0.00	0.00	2.40581e+06	1.80436e+06	300726	0	300726	0
1422	0	0	17959.8	0.00	0.00	2.10508e+06	601452	902178	601452	300726	300726
1423	0	0	17995.2	0.00	0.00	4.81162e+06	0	0	0	0	0
1424	0	44	18272.8	0.00	0.00	2.40581e+06	300726	1.50363e+06	0	300726	300726
1425	0	50	18815.7	0.00	0.00	4.21016e+06	0	601452	0	0	0
1426	0	59	19598	0.00	0.00	1.80436e+06	902178	300726	0	300726	1.50363e+06
1427	0	59	20596.9	0.00	0.00	1.50363e+06	1.80436e+06	1.50363e+06	0	0	0
1428	0	59	21506	0.00	0.00	2.40581e+06	300726	2.10508e+06	0	0	0
1429	0	59	22224.8	0.00	0.00	5.41307e+06	0	300726	0	300726	0
1430	0	59	22416.9	0.00	0.00	4.51089e+06	0	0	0	300726	0
1431	0	60	22608.3	0.00	0.00	4.51089e+06	0	0	0	300726	0
1432	0	45	23011.5	0.00	0.00	4.21016e+06	0	601452	0	0	0
1433	0	39	23310.8	0.00	0.00	3.30799e+06	0	601452	0	601452	300726
1434	0	42	21676.1	0.00	0.00	2.70653e+06	601452	1.50363e+06	0	0	0
1435	0	35	19977.8	0.00	0.00	3.30799e+06	0	1.2029e+06	0	0	300726
1436	0	36	18390.8	0.00	0.00	3.30799e+06	0	300726	0	601452	601452
1437	0	32	16956.4	0.00	0.00	1.2029e+06	601452	2.40581e+06	0	0	601452
1438	0	39	15702.8	0.00	0.00	4.81162e+06	0	0	0	0	0
1439	0	59	14694.6	0.00	0.00	5.41307e+06	300726	300726	0	0	0
1440	0	54	13963.3	0.00	0.00	3.30799e+06	601452	902178	0	0	0
1441	0	57	13577.2	0.00	0.00	601452	1.50363e+06	300726	0	0	2.40581e+06
1442	0	68	13508	0.00	0.00	3.30799e+06	1.2029e+06	300726	0	0	0
1443	0	51	13508	0.00	0.00	3.30799e+06	1.2029e+06	300726	0	0	0
1444	0	49	13544.7	0.00	0.00	3.00726e+06	601452	601452	0	0	601452
1445	0	40	13888.9	0.00	0.00	2.10508e+06	1.2029e+06	902178	0	0	601452
1446	0	53	14564.3	0.00	0.00	4.51089e+06	0	300726	0	0	0
1447	0	53	15541.1	0.00	0.00	4.51089e+06	0	300726	0	0	0
1448	0	53	16756.5	0.00	0.00	4.81162e+06	0	0	0	0	0
1449	0	72	18170.1	0.00	0.00	4.51089e+06	0	300726	0	0	0
1450	0	73	19734.2	0.00	0.00	6.01452e+06	0	0	0	0	0
1451	0	72	21419.4	0.00	0.00	2.70653e+06	300726	0	0	0	0
1452	0	45	22907.8	0.00	0.00	2.40581e+06	0	300726	0	0	0
1453	0	40	20986	0.00	0.00	0	0	0	0	0	0
1454	0	40	18783	0.00	0.00	0	601452	0	0	0	0
1455	0	46	16588.8	0.00	0.00	4.21016e+06	0	601452	0	0	0
1456	0	46	14407.7	0.00	0.00	2.10508e+06	902178	1.2029e+06	0	300726	300726
1457	0	41	12246.3	0.00	0.00	3.60871e+06	0	902178	0	300726	0
1458	0	45	10117.8	0.00	0.00	3.00726e+06	902178	902178	0	0	0
1459	1	46	8047.36	0.00	0.00	4.21016e+06	300726	300726	0	0	0
1460	2	40	6079.2	0.00	0.00	601452	2.40581e+06	2.40581e+06	0	300726	300726
1461	0	35	4054.44	0.00	0.00	3.30799e+06	300726	1.2029e+06	0	0	0
1462	0	33	2161.46	0.00	0.00	4.81162e+06	0	0	0	0	0
1463	0	34	124.17	0.00	0.00	4.81162e+06	0	0	0	0	0
1464	0	34	1222.7	0.00	0.00	0	1.50363e+06	300726	1.80436e+06	0	1.2029e+06
1465	2	32	987.774	0.00	0.00	1.2029e+06	902178	1.2029e+06	1.2029e+06	300726	0
1466	0	28	0	0.00	0.00	4.51089e+06	0	300726	0	0	0
1467	0	21	0	0.00	0.00	3.90944e+06	601452	300726	0	0	0
1468	0	38	0	0.00	0.00	4.21016e+06	0	601452	0	0	0
1469	0	34	683.282	0.00	0.00	902178	3.30799e+06	1.2029e+06	0	300726	300726
1470	3	28	2334.94	0.00	0.00	902178	2.40581e+06	1.50363e+06	0	0	0
1471	0	33	4497.27	0.00	0.00	2.40581e+06	601452	601452	300726	300726	601452
1472	0	36	6687.74	0.00	0.00	4.81162e+06	0	0	0	0	0
1473	0	44	5331.52	0.00	0.00	1.50363e+06	300726	1.50363e+06	902178	601452	0
1474	0	34	3095.32	0.00	0.00	4.81162e+06	0	0	0	0	0
1475	0	22	859.125	0.00	0.00	1.50363e+06	1.50363e+06	902178	0	0	902178
1476	0	31	0	0.00	0.00	2.70653e+06	0	2.10508e+06	0	0	0
1477	0	31	0	0.00	0.00	3.00726e+06	601452	1.2029e+06	0	0	0
1478	0	34	0	0.00	0.00	6.01452e+06	0	0	0	0	0
1479	0	34	0	0.00	0.00	4.81162e+06	0	0	0	0	0
1480	5	39	101.824	0.00	0.00	4.51089e+06	300726	0	0	0	0
1481	0	44	1924.22	0.00	0.00	2.10508e+06	300726	2.40581e+06	0	0	0
1482	0	30	4140.37	0.00	0.00	601452	300726	1.80436e+06	0	601452	1.50363e+06
1483	2	37	4330.78	0.00	0.00	2.40581e+06	300726	1.50363e+06	0	0	601452
1484	1	40	2112.83	0.00	0.00	3.90944e+06	0	601452	0	0	300726
1485	0	46	137.944	0.00	0.00	3.00726e+06	601452	1.2029e+06	0	0	0
1486	0	44	616.391	0.00	0.00	3.30799e+06	601452	902178	0	0	0
1487	0	40	2695.45	0.00	0.00	4.21016e+06	0	601452	0	0	0
1488	0	0	4642.2	0.00	0.00	5.11234e+06	0	902178	0	0	0
1489	0	34	6701.12	0.00	0.00	3.60871e+06	601452	601452	0	0	0
1490	0	34	7323.33	0.00	0.00	1.2029e+06	1.2029e+06	1.2029e+06	300726	0	902178
1491	0	48	30285.3	0.00	0.00	3.90944e+06	902178	0	0	0	0
1492	0	40	28657	0.00	0.00	3.00726e+06	601452	1.2029e+06	0	0	0
1493	0	37	27116.9	0.00	0.00	2.70653e+06	601452	601452	0	0	902178
1494	0	43	25677.9	0.00	0.00	3.30799e+06	1.2029e+06	300726	0	0	0
1495	0	45	24361	0.00	0.00	3.30799e+06	0	601452	0	601452	300726
1496	0	34	23183.8	0.00	0.00	4.81162e+06	0	0	0	0	0
1497	0	34	22171.8	0.00	0.00	3.90944e+06	300726	601452	0	0	0
1498	0	51	21345.6	0.00	0.00	4.81162e+06	0	0	0	0	0
1499	0	59	20729.7	0.00	0.00	3.00726e+06	601452	300726	0	0	0
1500	0	46	20341.8	0.00	0.00	0	0	0	0	0	0
1501	0	0	20195.4	0.00	0.00	0	0	0	0	0	0
1502	0	0	20226.9	0.00	0.00	3.30799e+06	300726	300726	0	0	902178
1503	0	45	20474.3	0.00	0.00	3.60871e+06	300726	601452	0	300726	0
1504	0	41	20960.3	0.00	0.00	3.30799e+06	0	1.2029e+06	0	300726	0
1505	0	50	21665.4	0.00	0.00	902178	1.80436e+06	902178	0	0	1.2029e+06
1506	0	59	22573.1	0.00	0.00	601452	2.40581e+06	1.50363e+06	0	300726	0
1507	0	59	23629.7	0.00	0.00	3.00726e+06	601452	300726	0	902178	0
1508	0	59	24333.6	0.00	0.00	601452	2.10508e+06	601452	0	2.70653e+06	0
1509	0	59	24651.7	0.00	0.00	2.40581e+06	601452	1.2029e+06	0	601452	0
1510	0	59	24825.9	0.00	0.00	4.81162e+06	0	0	0	0	0
1511	0	53	25193.6	0.00	0.00	4.81162e+06	0	0	0	0	0
1512	0	40	24822.6	0.00	0.00	4.51089e+06	0	300726	0	0	0
1513	0	40	23136.3	0.00	0.00	0	601452	300726	3.30799e+06	300726	300726
1514	0	37	21553.5	0.00	0.00	0	1.80436e+06	601452	1.2029e+06	300726	902178
1515	0	47	20090.9	0.00	0.00	2.40581e+06	902178	1.2029e+06	300726	0	0
1516	0	49	18787	0.00	0.00	4.21016e+06	0	601452	0	0	0
1517	0	35	17663.4	0.00	0.00	4.21016e+06	601452	0	0	0	0
1518	0	55	16773.6	0.00	0.00	601452	2.70653e+06	1.50363e+06	0	0	0
1519	0	61	16136.5	0.00	0.00	3.30799e+06	300726	601452	0	0	601452
1520	0	78	15803.7	0.00	0.00	4.81162e+06	0	0	0	0	0
1521	0	84	15744.2	0.00	0.00	4.81162e+06	0	0	0	0	0
1522	0	61	15744.2	0.00	0.00	2.10508e+06	601452	1.80436e+06	0	300726	0
1523	0	46	15775.7	0.00	0.00	3.30799e+06	902178	601452	0	0	0
1524	0	43	16072.3	0.00	0.00	300726	1.80436e+06	2.10508e+06	0	0	601452
1525	0	44	16659.4	0.00	0.00	902178	2.10508e+06	1.80436e+06	0	0	0
1526	0	58	17520	0.00	0.00	1.50363e+06	1.2029e+06	1.80436e+06	300726	0	0
1527	0	59	18606.6	0.00	0.00	5.41307e+06	300726	300726	0	0	0
1528	0	68	19889.4	0.00	0.00	4.21016e+06	0	300726	0	300726	0
1529	0	79	21327.8	0.00	0.00	1.2029e+06	0	2.40581e+06	0	1.2029e+06	0
1530	0	76	22896.1	0.00	0.00	902178	601452	3.30799e+06	0	0	0
1531	0	48	22976.3	0.00	0.00	1.80436e+06	902178	1.50363e+06	0	300726	300726
1532	0	40	20743.6	0.00	0.00	2.70653e+06	902178	601452	0	601452	0
1533	0	40	18511.7	0.00	0.00	3.30799e+06	601452	601452	0	300726	0
1534	0	42	16281.1	0.00	0.00	3.90944e+06	300726	601452	0	0	0
1535	0	46	14052.2	0.00	0.00	1.80436e+06	1.2029e+06	1.2029e+06	0	0	601452
1536	0	46	11826	0.00	0.00	1.80436e+06	601452	1.80436e+06	0	300726	300726
1537	0	46	9604.62	0.00	0.00	3.90944e+06	300726	601452	0	0	0
1538	0	45	7391.97	0.00	0.00	4.81162e+06	0	0	0	0	0
1539	0	40	5199.8	0.00	0.00	4.21016e+06	0	601452	0	0	0
1540	0	40	3069.12	0.00	0.00	4.81162e+06	0	0	0	0	0
1541	0	37	1231.38	0.00	0.00	2.70653e+06	300726	902178	0	0	0
1542	0	34	0	0.00	0.00	300726	0	300726	0	0	0
1543	0	38	1899.62	0.00	0.00	300726	0	300726	0	0	0
1544	0	34	1836.77	0.00	0.00	1.50363e+06	0	0	0	0	0
1545	0	27	372.923	0.00	0.00	300726	300726	300726	0	0	0
1546	0	29	0	0.00	0.00	0	0	0	0	0	0
1547	0	40	0	0.00	0.00	601452	0	0	0	0	0
1548	0	39	0	0.00	0.00	0	300726	0	0	0	0
1549	0	27	2189.22	0.00	0.00	3.30799e+06	902178	601452	0	0	0
1550	0	25	4425.42	0.00	0.00	4.81162e+06	0	0	0	0	0
1551	0	41	6661.62	0.00	0.00	4.21016e+06	300726	300726	0	0	0
1552	0	41	5556.58	0.00	0.00	1.80436e+06	601452	2.40581e+06	0	0	0
1553	0	28	3471.84	0.00	0.00	300726	2.70653e+06	1.2029e+06	0	0	601452
1554	0	28	1763.03	0.00	0.00	300726	902178	1.50363e+06	300726	1.80436e+06	0
1555	0	34	1514.81	0.00	0.00	0	1.80436e+06	300726	300726	3.60871e+06	0
1556	0	34	1514.81	0.00	0.00	3.60871e+06	300726	902178	0	0	0
1557	2	34	1514.81	0.00	0.00	4.81162e+06	0	0	0	0	0
1558	3	38	1514.81	0.00	0.00	4.81162e+06	0	0	0	0	0
1559	0	39	1670.6	0.00	0.00	4.21016e+06	0	300726	0	300726	0
1560	2	40	3074.37	0.00	0.00	0	902178	0	902178	300726	2.70653e+06
1561	0	33	4790.58	0.00	0.00	601452	1.80436e+06	601452	601452	1.2029e+06	0
1562	0	34	4313.54	0.00	0.00	1.80436e+06	601452	902178	300726	1.2029e+06	0
1563	0	40	2077.34	0.00	0.00	1.50363e+06	1.50363e+06	1.50363e+06	0	300726	0
1564	0	46	0	0.00	0.00	1.2029e+06	1.2029e+06	1.80436e+06	601452	0	0
1565	1	44	616.391	0.00	0.00	2.70653e+06	601452	1.50363e+06	0	0	0
1566	0	0	2852.59	0.00	0.00	2.70653e+06	902178	902178	300726	0	0
1567	0	0	5088.79	0.00	0.00	4.81162e+06	0	0	0	0	0
1568	0	0	7321.51	0.00	0.00	4.81162e+06	0	0	0	0	0
1569	0	35	9363	0.00	0.00	1.50363e+06	902178	1.80436e+06	601452	0	0
1570	0	45	33442.1	0.00	0.00	1.2029e+06	2.40581e+06	1.2029e+06	0	0	0
1571	0	52	31819.6	0.00	0.00	2.40581e+06	601452	1.2029e+06	0	601452	0
1572	0	40	30273.8	0.00	0.00	300726	300726	4.21016e+06	0	0	0
1573	0	39	28820.4	0.00	0.00	1.50363e+06	902178	1.80436e+06	0	0	601452
1574	0	46	27470.7	0.00	0.00	3.00726e+06	601452	601452	0	601452	0
1575	0	39	26244	0.00	0.00	3.00726e+06	1.2029e+06	601452	0	0	0
1576	0	34	25155.2	0.00	0.00	4.81162e+06	0	0	0	0	0
1577	0	33	24225.7	0.00	0.00	3.00726e+06	300726	1.50363e+06	0	0	0
1578	0	50	23472	0.00	0.00	1.50363e+06	1.80436e+06	1.50363e+06	0	0	0
1579	0	54	22913.3	0.00	0.00	3.60871e+06	300726	902178	0	0	0
1580	1	0	22563	0.00	0.00	1.50363e+06	1.2029e+06	1.2029e+06	0	0	902178
1581	1	0	22431.1	0.00	0.00	2.70653e+06	1.50363e+06	601452	0	0	0
1582	1	46	22459.5	0.00	0.00	1.80436e+06	2.10508e+06	902178	0	0	0
1583	0	46	23122.2	0.00	0.00	3.90944e+06	902178	0	0	0	0
1584	0	46	23763.2	0.00	0.00	4.81162e+06	0	0	0	0	0
1585	0	59	24593.5	0.00	0.00	2.70653e+06	300726	1.80436e+06	0	0	0
1586	0	59	25590.7	0.00	0.00	4.81162e+06	0	0	0	0	0
1587	0	59	26445.4	0.00	0.00	3.90944e+06	300726	300726	0	300726	0
1588	0	59	26886.7	0.00	0.00	4.21016e+06	300726	300726	0	0	0
1589	0	59	27046.5	0.00	0.00	3.30799e+06	0	300726	0	0	300726
1590	0	55	27384.4	0.00	0.00	2.40581e+06	300726	0	0	0	0
1591	0	51	26297.6	0.00	0.00	3.30799e+06	0	0	0	0	0
1592	0	42	24711.9	0.00	0.00	4.81162e+06	0	0	0	0	0
1593	0	41	23237	0.00	0.00	4.51089e+06	0	300726	0	0	0
1594	0	80	21887	0.00	0.00	4.21016e+06	300726	0	0	0	0
1595	0	84	20696.8	0.00	0.00	2.10508e+06	902178	902178	0	0	300726
1596	0	76	19682.4	0.00	0.00	0	300726	0	0	0	0
1597	0	52	18888.2	0.00	0.00	0	0	0	0	0	0
1598	0	69	18324.8	0.00	0.00	601452	0	300726	0	0	0
1599	0	80	18032.5	0.00	0.00	0	0	0	0	0	0
1600	0	72	17980.4	0.00	0.00	0	902178	0	0	0	601452
1601	0	54	17980.4	0.00	0.00	300726	3.30799e+06	902178	300726	0	0
1602	0	46	18008	0.00	0.00	1.80436e+06	2.40581e+06	300726	0	300726	0
1603	0	46	18268.3	0.00	0.00	4.51089e+06	0	300726	0	0	0
1604	0	46	18786.9	0.00	0.00	4.81162e+06	0	0	0	0	0
1605	0	46	19554	0.00	0.00	1.2029e+06	1.2029e+06	2.10508e+06	0	300726	0
1606	0	47	20533.1	0.00	0.00	300726	1.50363e+06	3.00726e+06	0	0	0
1607	0	53	21702.4	0.00	0.00	1.50363e+06	1.2029e+06	1.50363e+06	0	601452	0
1608	0	66	23027.6	0.00	0.00	3.60871e+06	601452	601452	0	0	0
1609	0	59	24444.9	0.00	0.00	4.81162e+06	0	0	0	0	0
1610	0	59	22943.7	0.00	0.00	4.81162e+06	0	0	0	0	0
1611	0	46	20707.5	0.00	0.00	4.81162e+06	0	0	0	0	0
1612	0	56	18471.3	0.00	0.00	0	3.60871e+06	300726	0	0	902178
1613	0	58	16235.1	0.00	0.00	0	1.2029e+06	0	1.50363e+06	601452	1.50363e+06
1614	0	59	13998.9	0.00	0.00	0	4.21016e+06	300726	0	0	300726
1615	0	59	11762.7	0.00	0.00	3.30799e+06	601452	902178	0	0	0
1616	0	59	9526.5	0.00	0.00	3.00726e+06	1.2029e+06	601452	0	0	0
1617	0	44	7290.3	0.00	0.00	300726	902178	2.10508e+06	1.2029e+06	300726	0
1618	0	40	5054.1	0.00	0.00	4.51089e+06	0	300726	0	0	0
1619	0	38	2817.9	0.00	0.00	3.60871e+06	300726	902178	0	0	0
1620	0	34	581.701	0.00	0.00	1.50363e+06	2.40581e+06	902178	0	0	0
1621	2	40	0	0.00	0.00	5.11234e+06	300726	601452	0	0	0
1622	0	40	1177.49	0.00	0.00	1.2029e+06	1.50363e+06	1.80436e+06	0	300726	0
1623	0	34	695.661	0.00	0.00	2.40581e+06	1.50363e+06	902178	0	0	0
1624	0	30	0	0.00	0.00	1.50363e+06	1.50363e+06	1.80436e+06	0	0	0
1625	0	34	816.624	0.00	0.00	300726	2.70653e+06	1.50363e+06	300726	0	0
1626	0	40	1083.01	0.00	0.00	3.00726e+06	1.2029e+06	601452	0	0	0
1627	1	40	1399.24	0.00	0.00	4.81162e+06	0	0	0	0	0
1628	2	30	2972.45	0.00	0.00	300726	2.10508e+06	1.2029e+06	300726	0	902178
1629	0	37	4856.53	0.00	0.00	3.30799e+06	601452	902178	0	0	0
1630	2	54	6957.35	0.00	0.00	3.00726e+06	1.50363e+06	300726	0	0	0
1631	1	68	6525.57	0.00	0.00	4.21016e+06	300726	300726	0	0	0
1632	0	59	4880.41	0.00	0.00	4.21016e+06	300726	300726	0	0	0
1633	0	32	3852.27	0.00	0.00	3.90944e+06	300726	601452	0	0	0
1634	3	23	3751.01	0.00	0.00	4.51089e+06	0	300726	0	0	0
1635	2	34	3751.01	0.00	0.00	2.40581e+06	1.80436e+06	300726	0	0	300726
1636	3	34	3751.01	0.00	0.00	902178	1.2029e+06	1.50363e+06	0	300726	0
1637	0	40	3751.01	0.00	0.00	4.81162e+06	0	0	0	0	0
1638	0	28	3814.56	0.00	0.00	4.51089e+06	0	300726	0	0	0
1639	0	40	4662.79	0.00	0.00	2.70653e+06	601452	1.50363e+06	0	0	0
1640	0	38	4520.18	0.00	0.00	902178	902178	601452	0	0	300726
1641	0	36	3417.16	0.00	0.00	0	3.00726e+06	0	0	601452	601452
1642	0	40	2027.65	0.00	0.00	2.10508e+06	0	2.40581e+06	0	300726	0
1643	2	46	158.859	0.00	0.00	4.51089e+06	0	0	0	300726	0
1644	1	43	2026.72	0.00	0.00	4.21016e+06	300726	300726	0	0	0
1645	0	40	3485.5	0.00	0.00	3.60871e+06	0	902178	0	300726	0
1646	0	0	5470.06	0.00	0.00	0	1.50363e+06	0	0	0	3.30799e+06
1647	0	56	7594.62	0.00	0.00	300726	1.2029e+06	1.80436e+06	300726	0	1.2029e+06
1648	0	46	34981.3	0.00	0.00	300726	3.60871e+06	601452	300726	0	0
1649	0	51	33433.6	0.00	0.00	1.80436e+06	1.50363e+06	601452	601452	300726	0
1650	0	46	31965.9	0.00	0.00	2.70653e+06	0	1.80436e+06	300726	0	0
1651	0	43	30593	0.00	0.00	3.00726e+06	0	1.80436e+06	0	0	0
1652	2	45	29324.9	0.00	0.00	1.50363e+06	1.2029e+06	1.80436e+06	300726	0	0
1653	0	34	28179.1	0.00	0.00	0	1.80436e+06	300726	1.80436e+06	0	902178
1654	0	33	27167.8	0.00	0.00	601452	2.10508e+06	2.10508e+06	0	0	0
1655	0	32	26309.5	0.00	0.00	300726	2.40581e+06	2.10508e+06	0	0	0
1656	0	47	25617.2	0.00	0.00	601452	1.80436e+06	1.80436e+06	300726	300726	0
1657	0	42	25106.2	0.00	0.00	601452	2.10508e+06	2.10508e+06	0	0	0
1658	0	0	24787	0.00	0.00	4.21016e+06	0	1.80436e+06	0	0	0
1659	0	0	24667	0.00	0.00	4.51089e+06	300726	0	0	0	0
1660	0	45	24692.8	0.00	0.00	0	3.00726e+06	1.80436e+06	0	0	0
1661	0	46	25297.1	0.00	0.00	902178	3.60871e+06	300726	0	0	0
1662	0	46	25884.2	0.00	0.00	1.2029e+06	1.2029e+06	2.10508e+06	0	300726	0
1663	0	58	26648.6	0.00	0.00	4.21016e+06	0	601452	0	0	0
1664	0	50	27571.5	0.00	0.00	2.10508e+06	1.2029e+06	902178	0	601452	0
1665	0	48	28563.4	0.00	0.00	300726	4.51089e+06	0	0	0	0
1666	0	59	29112.5	0.00	0.00	300726	3.30799e+06	1.2029e+06	0	0	0
1667	0	59	29269.5	0.00	0.00	1.50363e+06	2.40581e+06	902178	0	0	0
1668	0	59	29404.2	0.00	0.00	2.40581e+06	1.80436e+06	601452	0	0	0
1669	0	58	27874.6	0.00	0.00	3.90944e+06	300726	601452	0	0	0
1670	0	62	26383.7	0.00	0.00	1.80436e+06	300726	1.80436e+06	0	300726	601452
1671	0	71	25007.7	0.00	0.00	2.70653e+06	601452	1.50363e+06	0	0	0
1672	0	83	23758.3	0.00	0.00	3.90944e+06	601452	300726	0	0	0
1673	0	84	22666.8	0.00	0.00	902178	1.80436e+06	2.10508e+06	0	0	0
1674	0	75	21744.3	0.00	0.00	3.00726e+06	1.80436e+06	0	0	0	0
1675	0	70	21028.2	0.00	0.00	3.60871e+06	601452	300726	0	0	300726
1676	0	59	20523.5	0.00	0.00	4.81162e+06	0	0	0	0	0
1677	0	62	20262.9	0.00	0.00	6.01452e+06	0	0	0	0	0
1678	0	62	20216.6	0.00	0.00	4.81162e+06	0	0	0	0	0
1679	0	46	20216.6	0.00	0.00	4.21016e+06	601452	0	0	0	0
1680	0	46	20241.1	0.00	0.00	3.30799e+06	1.2029e+06	300726	0	0	0
1681	0	46	20473.1	0.00	0.00	1.50363e+06	1.50363e+06	1.50363e+06	0	300726	0
1682	0	46	20937.1	0.00	0.00	1.80436e+06	1.2029e+06	1.50363e+06	0	300726	0
1683	0	46	21628.2	0.00	0.00	2.10508e+06	1.50363e+06	902178	0	300726	0
1684	0	46	22517.3	0.00	0.00	1.2029e+06	902178	2.70653e+06	0	0	0
1685	0	44	23588.5	0.00	0.00	0	2.10508e+06	2.40581e+06	0	300726	0
1686	0	35	24813.2	0.00	0.00	0	2.70653e+06	1.50363e+06	0	300726	300726
1687	0	50	25137	0.00	0.00	3.60871e+06	0	1.2029e+06	0	0	0
1688	0	58	22943.7	0.00	0.00	2.40581e+06	0	2.10508e+06	300726	0	0
1689	0	59	20707.5	0.00	0.00	3.30799e+06	601452	601452	300726	0	0
1690	0	59	18471.3	0.00	0.00	4.51089e+06	0	300726	0	0	0
1691	0	59	16235.1	0.00	0.00	902178	1.50363e+06	0	0	0	2.40581e+06
1692	0	59	13998.9	0.00	0.00	601452	3.30799e+06	0	0	902178	0
1693	0	60	11762.7	0.00	0.00	0	3.90944e+06	902178	0	0	0
1694	0	74	9526.5	0.00	0.00	601452	2.10508e+06	902178	902178	1.50363e+06	0
1695	0	59	7290.3	0.00	0.00	601452	1.2029e+06	3.00726e+06	0	0	0
1696	0	39	5054.1	0.00	0.00	2.40581e+06	601452	1.50363e+06	300726	0	0
1697	0	43	2817.9	0.00	0.00	902178	0	3.90944e+06	0	0	0
1698	0	40	581.701	0.00	0.00	0	1.80436e+06	300726	1.80436e+06	300726	601452
1699	1	40	0	0.00	0.00	1.2029e+06	1.80436e+06	1.50363e+06	0	300726	0
1700	2	40	968.701	0.00	0.00	300726	2.40581e+06	2.10508e+06	0	0	0
1701	0	37	579.124	0.00	0.00	300726	3.00726e+06	1.50363e+06	0	0	0
1702	0	34	0	0.00	0.00	601452	2.40581e+06	1.50363e+06	300726	0	0
1703	2	34	1577.87	0.00	0.00	902178	2.10508e+06	3.00726e+06	0	0	0
1704	0	40	3173.49	0.00	0.00	3.60871e+06	0	601452	300726	300726	0
1705	0	40	3431.74	0.00	0.00	601452	3.00726e+06	1.2029e+06	0	0	0
1706	2	40	4547.04	0.00	0.00	1.2029e+06	1.80436e+06	1.80436e+06	0	0	0
1707	2	50	6114.85	0.00	0.00	601452	1.50363e+06	2.10508e+06	300726	0	300726
1708	1	68	7890.45	0.00	0.00	3.30799e+06	902178	601452	0	0	0
1709	0	71	8021.57	0.00	0.00	2.40581e+06	1.80436e+06	601452	0	0	0
1710	0	63	6754.1	0.00	0.00	300726	3.60871e+06	902178	0	0	0
1711	0	38	6050.96	0.00	0.00	0	4.21016e+06	601452	0	0	0
1712	2	34	5987.21	0.00	0.00	902178	3.00726e+06	902178	0	0	0
1713	0	39	5987.21	0.00	0.00	2.70653e+06	1.50363e+06	601452	0	0	0
1714	1	40	5987.21	0.00	0.00	3.30799e+06	601452	902178	0	0	0
1715	0	39	5987.21	0.00	0.00	1.80436e+06	1.80436e+06	300726	300726	0	601452
1716	0	34	5883.95	0.00	0.00	2.70653e+06	1.2029e+06	601452	0	300726	0
1717	0	38	4524.64	0.00	0.00	2.70653e+06	1.2029e+06	902178	0	0	0
1718	3	40	3098.45	0.00	0.00	1.80436e+06	2.10508e+06	902178	0	0	0
1719	2	37	1404.62	0.00	0.00	300726	1.80436e+06	2.10508e+06	0	300726	300726
1720	0	41	489.955	0.00	0.00	4.81162e+06	0	0	0	0	0
1721	4	43	741.924	0.00	0.00	3.30799e+06	601452	902178	0	0	0
1722	0	44	2515.48	0.00	0.00	3.00726e+06	902178	902178	0	0	0
1723	0	0	4676.58	0.00	0.00	3.30799e+06	1.50363e+06	0	0	0	0
1724	0	60	6615.96	0.00	0.00	4.21016e+06	601452	0	0	0	0
1725	0	54	8456.99	0.00	0.00	6.01452e+06	0	0	0	0	0
1726	0	50	36592.1	0.00	0.00	4.81162e+06	0	0	0	0	0
1727	0	45	35115.6	0.00	0.00	4.81162e+06	0	0	0	0	0
1728	0	0	33721.1	0.00	0.00	4.21016e+06	601452	0	0	0	0
1729	0	0	32422.7	0.00	0.00	3.00726e+06	902178	902178	0	0	0
1730	0	35	31229	0.00	0.00	2.70653e+06	1.2029e+06	902178	0	0	0
1731	0	34	30155.6	0.00	0.00	3.30799e+06	902178	601452	0	0	0
1732	0	28	29212.9	0.00	0.00	4.21016e+06	300726	300726	0	0	0
1733	0	40	28416.4	0.00	0.00	2.70653e+06	300726	1.2029e+06	0	0	601452
1734	0	42	27776.7	0.00	0.00	1.50363e+06	1.50363e+06	300726	0	0	1.50363e+06
1735	0	43	27306.2	0.00	0.00	2.40581e+06	1.80436e+06	601452	0	0	0
1736	0	0	27012.9	0.00	0.00	3.90944e+06	300726	601452	0	0	0
1737	0	0	26902.8	0.00	0.00	3.00726e+06	902178	902178	0	0	0
1738	0	40	28023.1	0.00	0.00	1.80436e+06	2.10508e+06	902178	0	0	0
1739	0	40	28730.7	0.00	0.00	1.50363e+06	1.2029e+06	2.10508e+06	0	0	0
1740	0	40	29588.7	0.00	0.00	300726	2.10508e+06	2.40581e+06	0	0	0
1741	0	40	30588.6	0.00	0.00	0	2.70653e+06	1.2029e+06	300726	601452	0
1742	0	40	31333.6	0.00	0.00	300726	902178	1.50363e+06	2.10508e+06	0	0
1743	0	47	31494.4	0.00	0.00	0	1.50363e+06	2.10508e+06	0	1.2029e+06	0
1744	0	44	31034.6	0.00	0.00	2.40581e+06	601452	902178	601452	300726	0
1745	0	53	29536.5	0.00	0.00	2.10508e+06	601452	601452	902178	601452	0
1746	0	59	28133.7	0.00	0.00	2.40581e+06	300726	1.80436e+06	0	300726	0
1747	0	78	26847.7	0.00	0.00	3.00726e+06	300726	902178	300726	300726	0
1748	0	84	25687.9	0.00	0.00	0	300726	0	1.2029e+06	300726	3.00726e+06
1749	0	83	24682	0.00	0.00	0	2.40581e+06	0	601452	0	1.80436e+06
1750	0	56	23837.5	0.00	0.00	0	3.60871e+06	601452	601452	300726	902178
1751	0	63	23186.2	0.00	0.00	0	2.70653e+06	902178	300726	300726	601452
1752	0	55	22729.5	0.00	0.00	902178	601452	3.30799e+06	0	0	0
1753	0	53	22494.5	0.00	0.00	1.50363e+06	1.50363e+06	1.80436e+06	0	0	0
1754	0	46	22452.8	0.00	0.00	300726	3.00726e+06	601452	0	0	902178
1755	0	46	22452.8	0.00	0.00	601452	3.00726e+06	902178	0	300726	0
1756	0	46	22474.9	0.00	0.00	0	3.90944e+06	902178	0	0	0
1757	0	43	22684	0.00	0.00	601452	1.2029e+06	2.10508e+06	902178	0	0
1758	0	41	23103.7	0.00	0.00	601452	2.40581e+06	1.80436e+06	0	0	0
1759	0	42	23731.8	0.00	0.00	1.2029e+06	2.10508e+06	2.70653e+06	0	0	0
1760	0	46	24544.7	0.00	0.00	3.30799e+06	601452	902178	0	0	0
1761	0	46	25531	0.00	0.00	300726	2.70653e+06	1.80436e+06	0	0	0
1762	0	46	26612.8	0.00	0.00	601452	2.10508e+06	2.10508e+06	0	0	0
1763	0	46	25262	0.00	0.00	1.2029e+06	1.80436e+06	902178	300726	300726	300726
1764	0	55	23033.7	0.00	0.00	2.10508e+06	1.2029e+06	1.50363e+06	0	0	0
1765	0	41	20807.2	0.00	0.00	601452	3.30799e+06	601452	300726	0	0
1766	0	45	18583	0.00	0.00	0	4.21016e+06	300726	300726	0	0
1767	0	46	16362.1	0.00	0.00	300726	3.00726e+06	1.2029e+06	0	300726	0
1768	0	46	14146	0.00	0.00	2.40581e+06	1.50363e+06	902178	0	0	0
1769	0	47	11937.3	0.00	0.00	2.10508e+06	902178	1.80436e+06	0	0	0
1770	0	78	9741.31	0.00	0.00	2.70653e+06	1.80436e+06	0	0	300726	0
1771	0	71	7568.6	0.00	0.00	2.10508e+06	902178	601452	300726	300726	601452
1772	0	57	5448.32	0.00	0.00	4.51089e+06	0	300726	0	0	0
1773	0	48	3472.18	0.00	0.00	3.30799e+06	1.50363e+06	0	0	0	0
1774	0	46	2111.78	0.00	0.00	601452	3.00726e+06	902178	300726	0	0
1775	0	46	1154.71	0.00	0.00	4.51089e+06	300726	0	0	0	0
1776	0	46	1863.48	0.00	0.00	4.21016e+06	300726	300726	0	0	0
1777	2	45	994.44	0.00	0.00	3.90944e+06	601452	300726	0	0	0
1778	0	40	1323.52	0.00	0.00	3.00726e+06	1.2029e+06	601452	0	0	0
1779	0	40	2645.52	0.00	0.00	4.51089e+06	300726	0	0	0	0
1780	0	34	4436.6	0.00	0.00	5.71379e+06	300726	0	0	0	0
1781	0	36	5619.31	0.00	0.00	4.81162e+06	0	0	0	0	0
1782	0	40	6365.71	0.00	0.00	4.81162e+06	0	0	0	0	0
1783	0	62	7693.31	0.00	0.00	4.81162e+06	0	0	0	0	0
1784	0	77	9277.97	0.00	0.00	3.90944e+06	601452	300726	0	0	0
1785	0	71	9802.78	0.00	0.00	300726	2.70653e+06	1.80436e+06	0	0	0
1786	0	69	8797.49	0.00	0.00	3.60871e+06	0	1.2029e+06	0	0	0
1787	0	55	8269.82	0.00	0.00	2.70653e+06	1.2029e+06	902178	0	0	0
1788	0	40	8223.41	0.00	0.00	1.2029e+06	1.50363e+06	300726	0	0	1.80436e+06
1789	0	40	8223.41	0.00	0.00	601452	1.50363e+06	2.40581e+06	0	0	300726
1790	0	40	8223.41	0.00	0.00	902178	902178	1.50363e+06	0	0	300726
1791	0	38	7926.17	0.00	0.00	0	0	0	0	0	0
1792	0	34	5738.5	0.00	0.00	0	1.50363e+06	300726	0	0	0
1793	0	30	3535.58	0.00	0.00	1.80436e+06	3.00726e+06	902178	0	300726	0
1794	2	30	1447.7	0.00	0.00	1.50363e+06	2.70653e+06	1.80436e+06	0	0	0
1795	1	40	569.646	0.00	0.00	1.2029e+06	2.70653e+06	2.10508e+06	0	0	0
1796	2	41	0	0.00	0.00	1.2029e+06	2.40581e+06	1.50363e+06	0	300726	601452
1797	1	46	1517.05	0.00	0.00	4.21016e+06	0	1.80436e+06	0	0	0
1798	0	38	3487.49	0.00	0.00	1.2029e+06	1.50363e+06	3.00726e+06	0	300726	0
1799	0	0	5456.32	0.00	0.00	0	2.40581e+06	3.00726e+06	300726	300726	0
1800	0	0	7459.64	0.00	0.00	300726	2.70653e+06	1.80436e+06	601452	0	0
1801	0	53	9558.13	0.00	0.00	902178	1.2029e+06	3.60871e+06	0	300726	0
1802	0	0	38266	0.00	0.00	2.40581e+06	1.50363e+06	902178	300726	902178	0
1803	0	0	36856.7	0.00	0.00	3.30799e+06	902178	1.50363e+06	0	300726	0
1804	0	0	35530.5	0.00	0.00	1.80436e+06	1.80436e+06	902178	601452	902178	0
1805	0	40	34300.7	0.00	0.00	2.40581e+06	902178	2.10508e+06	0	601452	0
1806	0	45	33174.6	0.00	0.00	3.90944e+06	1.2029e+06	902178	0	0	0
1807	0	34	32166.3	0.00	0.00	0	3.00726e+06	0	0	300726	2.70653e+06
1808	0	40	31284.1	0.00	0.00	0	2.10508e+06	300726	601452	0	4.51089e+06
1809	0	40	30541.8	0.00	0.00	0	4.51089e+06	300726	601452	300726	300726
1810	0	40	29947.4	0.00	0.00	0	5.41307e+06	300726	0	300726	0
1811	0	0	29511.6	0.00	0.00	300726	3.60871e+06	2.10508e+06	0	0	0
1812	0	0	29240.4	0.00	0.00	300726	3.00726e+06	2.70653e+06	0	0	0
1813	0	40	29138.8	0.00	0.00	300726	3.60871e+06	902178	300726	0	902178
1814	0	40	31635.4	0.00	0.00	0	3.90944e+06	1.2029e+06	300726	300726	300726
1815	0	41	32572.5	0.00	0.00	0	3.60871e+06	1.80436e+06	300726	300726	0
1816	0	41	33510.6	0.00	0.00	0	3.00726e+06	3.00726e+06	0	0	0
1817	0	40	33720.8	0.00	0.00	601452	3.60871e+06	1.80436e+06	0	0	0
1818	0	40	32688.8	0.00	0.00	0	3.90944e+06	3.60871e+06	0	0	0
1819	0	43	31270.2	0.00	0.00	300726	3.00726e+06	2.10508e+06	601452	0	0
1820	0	46	29948.6	0.00	0.00	0	4.51089e+06	1.50363e+06	0	0	0
1821	0	46	28744.1	0.00	0.00	902178	3.30799e+06	1.50363e+06	300726	0	0
1822	0	84	27663.7	0.00	0.00	902178	3.00726e+06	1.50363e+06	0	601452	0
1823	0	83	26732.4	0.00	0.00	601452	5.11234e+06	300726	0	0	0
1824	0	56	25954.6	0.00	0.00	300726	5.11234e+06	300726	0	0	300726
1825	0	49	25357.8	0.00	0.00	1.80436e+06	3.30799e+06	902178	0	0	0
1826	0	55	24940.9	0.00	0.00	3.60871e+06	2.40581e+06	1.50363e+06	0	0	0
1827	0	53	24726.9	0.00	0.00	902178	3.60871e+06	1.2029e+06	0	300726	0
1828	0	43	24689	0.00	0.00	3.30799e+06	1.80436e+06	601452	300726	0	0
1829	0	43	24689	0.00	0.00	2.70653e+06	1.50363e+06	601452	300726	0	902178
1830	0	40	24709.1	0.00	0.00	6.01452e+06	0	0	0	0	0
1831	0	40	24899.5	0.00	0.00	5.71379e+06	300726	0	0	0	0
1832	0	40	25282.3	0.00	0.00	1.50363e+06	3.30799e+06	1.2029e+06	0	0	0
1833	0	40	25857.6	0.00	0.00	6.01452e+06	0	0	0	0	0
1834	0	40	26605.6	0.00	0.00	6.01452e+06	0	0	0	0	0
1835	0	44	27518.2	0.00	0.00	4.51089e+06	902178	601452	0	0	0
1836	0	46	27743.7	0.00	0.00	4.51089e+06	0	1.50363e+06	0	0	0
1837	0	46	25536.3	0.00	0.00	6.01452e+06	0	0	0	0	0
1838	0	46	23334.2	0.00	0.00	7.21742e+06	0	300726	0	0	0
1839	0	42	21139.4	0.00	0.00	6.01452e+06	0	0	0	0	0
1840	0	40	18954.2	0.00	0.00	6.01452e+06	0	0	0	0	0
1841	0	40	16782.5	0.00	0.00	6.01452e+06	0	0	0	0	0
1842	0	45	14630.3	0.00	0.00	5.11234e+06	902178	0	0	0	0
1843	0	41	12507.4	0.00	0.00	601452	3.90944e+06	1.50363e+06	0	0	0
1844	0	65	10432.3	0.00	0.00	1.50363e+06	2.40581e+06	2.10508e+06	0	0	0
1845	0	67	8439.08	0.00	0.00	4.51089e+06	300726	1.2029e+06	0	0	0
1846	0	59	6605.65	0.00	0.00	3.60871e+06	902178	1.50363e+06	0	0	0
1847	0	48	5097.97	0.00	0.00	2.40581e+06	1.80436e+06	902178	0	0	902178
1848	0	46	4098.79	0.00	0.00	0	3.30799e+06	1.50363e+06	0	0	1.2029e+06
1849	0	46	3361.38	0.00	0.00	601452	1.50363e+06	3.60871e+06	0	0	0
1850	0	46	3669.3	0.00	0.00	0	0	0	0	0	0
1851	0	46	2662.74	0.00	0.00	0	300726	0	0	0	0
1852	0	40	2787.56	0.00	0.00	0	2.70653e+06	1.2029e+06	0	300726	601452
1853	0	40	4277.59	0.00	0.00	1.50363e+06	2.40581e+06	902178	0	0	0
1854	0	36	5800.25	0.00	0.00	601452	2.70653e+06	1.2029e+06	0	300726	0
1855	0	37	7497.76	0.00	0.00	2.70653e+06	0	1.80436e+06	0	300726	0
1856	0	40	8389.09	0.00	0.00	601452	3.60871e+06	601452	0	0	0
1857	0	40	9434.86	0.00	0.00	1.2029e+06	1.80436e+06	1.50363e+06	0	0	300726
1858	0	78	10858.2	0.00	0.00	2.40581e+06	902178	1.50363e+06	0	0	0
1859	0	71	11741.5	0.00	0.00	300726	3.00726e+06	1.2029e+06	0	300726	0
1860	0	73	10916.9	0.00	0.00	0	0	902178	300726	0	300726
1861	0	70	10496.1	0.00	0.00	0	1.2029e+06	2.10508e+06	0	300726	0
1862	0	53	10459.6	0.00	0.00	0	3.00726e+06	1.2029e+06	601452	0	0
1863	0	49	10459.6	0.00	0.00	300726	300726	1.50363e+06	1.2029e+06	1.50363e+06	0
1864	0	46	10086.5	0.00	0.00	1.50363e+06	902178	1.50363e+06	300726	601452	0
1865	0	46	7960.26	0.00	0.00	0	902178	2.40581e+06	601452	902178	0
1866	0	41	5739.05	0.00	0.00	2.40581e+06	601452	1.50363e+06	300726	0	0
1867	0	44	3536.47	0.00	0.00	2.10508e+06	1.2029e+06	601452	300726	601452	0
1868	0	53	1450.14	0.00	0.00	0	3.90944e+06	300726	0	1.2029e+06	601452
1869	2	42	676.935	0.00	0.00	0	1.50363e+06	0	902178	300726	2.10508e+06
1870	0	41	676.935	0.00	0.00	0	3.60871e+06	0	0	0	1.2029e+06
1871	0	46	2088.41	0.00	0.00	902178	902178	2.70653e+06	0	300726	0
1872	0	42	4245.76	0.00	0.00	300726	3.00726e+06	902178	300726	300726	0
1873	0	0	6390.75	0.00	0.00	0	2.10508e+06	300726	1.2029e+06	0	1.2029e+06
1874	0	0	8448.04	0.00	0.00	601452	1.50363e+06	1.80436e+06	601452	0	300726
1875	0	40	10453.4	0.00	0.00	0	2.10508e+06	2.70653e+06	0	0	0
1876	0	35	36219.5	0.00	0.00	601452	2.40581e+06	1.80436e+06	0	0	0
1877	0	40	35154.8	0.00	0.00	300726	3.90944e+06	1.80436e+06	0	0	0
1878	0	38	34204.9	0.00	0.00	0	3.00726e+06	1.80436e+06	0	0	0
1879	0	42	33376.7	0.00	0.00	0	2.40581e+06	2.40581e+06	0	0	0
1880	0	52	32681.9	0.00	0.00	601452	1.50363e+06	2.40581e+06	300726	0	0
1881	0	44	32127.2	0.00	0.00	902178	1.80436e+06	2.10508e+06	0	0	0
1882	0	0	31721.3	0.00	0.00	0	3.00726e+06	1.50363e+06	0	300726	0
1883	0	0	31469.2	0.00	0.00	0	4.51089e+06	300726	0	0	0
1884	0	46	31374.8	0.00	0.00	300726	3.60871e+06	601452	0	300726	0
1885	0	46	34587.3	0.00	0.00	0	4.51089e+06	300726	0	0	0
1886	0	46	35585.2	0.00	0.00	902178	3.30799e+06	1.2029e+06	300726	300726	0
1887	0	46	35748.6	0.00	0.00	601452	2.10508e+06	1.80436e+06	0	300726	0
1888	0	46	34409	0.00	0.00	1.80436e+06	2.40581e+06	601452	0	0	0
1889	0	46	33064.4	0.00	0.00	1.50363e+06	2.10508e+06	601452	0	0	601452
1890	0	46	31817.3	0.00	0.00	4.81162e+06	0	0	0	0	0
1891	0	46	30686.2	0.00	0.00	4.81162e+06	0	0	0	0	0
1892	0	74	29676.6	0.00	0.00	902178	3.30799e+06	601452	0	0	0
1893	0	61	28810.4	0.00	0.00	4.21016e+06	0	601452	0	0	0
1894	0	46	28090.2	0.00	0.00	4.21016e+06	601452	0	0	0	0
1895	0	37	27539.8	0.00	0.00	3.90944e+06	601452	300726	0	0	0
1896	0	58	27156.4	0.00	0.00	4.51089e+06	300726	0	0	0	0
1897	0	59	26960	0.00	0.00	4.21016e+06	601452	0	0	0	0
1898	0	53	26925.2	0.00	0.00	5.41307e+06	601452	0	0	0	0
1899	0	49	26925.2	0.00	0.00	4.81162e+06	0	0	0	0	0
1900	0	41	26943.6	0.00	0.00	4.81162e+06	0	0	0	0	0
1901	0	40	27118.3	0.00	0.00	4.81162e+06	0	0	0	0	0
1902	0	40	27470.3	0.00	0.00	1.80436e+06	2.40581e+06	601452	0	0	0
1903	0	40	28000.7	0.00	0.00	300726	3.30799e+06	902178	0	0	300726
1904	0	40	28692.8	0.00	0.00	2.70653e+06	300726	1.80436e+06	0	0	0
1905	0	40	29531.6	0.00	0.00	3.90944e+06	601452	300726	0	0	0
1906	0	41	28172.1	0.00	0.00	4.81162e+06	0	0	0	0	0
1907	0	46	26001	0.00	0.00	2.40581e+06	2.10508e+06	0	0	0	300726
1908	0	46	23841.9	0.00	0.00	1.50363e+06	2.10508e+06	1.50363e+06	300726	300726	300726
1909	0	46	21698.5	0.00	0.00	0	0	300726	0	0	0
1910	0	46	19575.8	0.00	0.00	0	2.10508e+06	0	0	300726	0
1911	0	43	17481.4	0.00	0.00	0	4.51089e+06	300726	0	0	0
1912	0	40	15427	0.00	0.00	2.70653e+06	601452	1.50363e+06	0	0	0
1913	0	40	13430.5	0.00	0.00	2.10508e+06	1.50363e+06	1.2029e+06	0	0	0
1914	0	46	11523	0.00	0.00	601452	2.40581e+06	1.80436e+06	0	0	0
1915	0	59	9754.71	0.00	0.00	0	3.60871e+06	1.2029e+06	0	0	0
1916	0	53	8220.55	0.00	0.00	0	0	0	0	0	300726
1917	0	53	7065.52	0.00	0.00	0	1.50363e+06	1.50363e+06	0	601452	0
1918	0	40	6074.35	0.00	0.00	902178	2.10508e+06	1.2029e+06	300726	300726	0
1919	0	41	5591.01	0.00	0.00	2.10508e+06	1.50363e+06	902178	0	300726	0
1920	0	43	5676.56	0.00	0.00	601452	2.10508e+06	1.2029e+06	601452	300726	0
1921	0	46	4802.84	0.00	0.00	601452	2.70653e+06	902178	601452	0	0
1922	0	40	4874.24	0.00	0.00	1.80436e+06	1.50363e+06	1.2029e+06	300726	0	0
1923	0	40	5852.36	0.00	0.00	2.10508e+06	1.2029e+06	902178	0	601452	0
1924	0	40	7410.07	0.00	0.00	2.40581e+06	300726	1.80436e+06	0	300726	0
1925	0	40	8951.77	0.00	0.00	0	2.40581e+06	300726	0	0	2.10508e+06
1926	0	38	10455.7	0.00	0.00	0	1.80436e+06	300726	0	300726	2.40581e+06
1927	0	38	11351.3	0.00	0.00	0	4.21016e+06	601452	0	0	0
1928	0	72	12560.1	0.00	0.00	902178	2.40581e+06	1.50363e+06	0	0	0
1929	0	73	13770.8	0.00	0.00	601452	2.40581e+06	1.80436e+06	0	0	0
1930	0	70	13075.2	0.00	0.00	300726	3.90944e+06	300726	300726	0	0
1931	0	54	12725.9	0.00	0.00	0	2.10508e+06	300726	601452	0	1.80436e+06
1932	0	47	12695.8	0.00	0.00	300726	2.40581e+06	601452	902178	0	601452
1933	0	46	12546.5	0.00	0.00	300726	2.10508e+06	2.40581e+06	0	0	0
1934	0	46	10575.5	0.00	0.00	0	2.70653e+06	2.10508e+06	0	0	0
1935	0	46	8449.57	0.00	0.00	0	3.30799e+06	1.2029e+06	300726	0	0
1936	0	52	6401.44	0.00	0.00	902178	3.60871e+06	300726	0	0	0
1937	0	53	4529.32	0.00	0.00	0	4.51089e+06	300726	0	0	0
1938	0	53	3183.22	0.00	0.00	0	3.60871e+06	902178	0	300726	0
1939	0	53	2913.14	0.00	0.00	1.2029e+06	3.60871e+06	0	0	0	0
1940	0	54	2913.14	0.00	0.00	4.21016e+06	601452	601452	0	601452	0
1941	0	59	3515.39	0.00	0.00	902178	3.00726e+06	902178	0	0	0
1942	0	46	5105.49	0.00	0.00	601452	3.30799e+06	902178	0	0	0
1943	0	41	7051.4	0.00	0.00	1.50363e+06	2.40581e+06	601452	0	300726	0
1944	0	0	9132.29	0.00	0.00	4.21016e+06	300726	0	0	300726	0
1945	0	0	11272.4	0.00	0.00	4.51089e+06	300726	0	0	0	0
1946	0	40	13412.2	0.00	0.00	2.40581e+06	2.40581e+06	0	0	0	0
1947	0	0	38172.7	0.00	0.00	4.21016e+06	601452	0	0	0	0
1948	0	46	37164	0.00	0.00	3.90944e+06	601452	300726	0	0	0
1949	0	0	36266.8	0.00	0.00	4.51089e+06	300726	0	0	0	0
1950	0	0	35486.8	0.00	0.00	4.81162e+06	0	0	0	0	0
1951	0	0	34834.1	0.00	0.00	4.51089e+06	300726	0	0	0	0
1952	0	0	34314.2	0.00	0.00	5.71379e+06	0	300726	0	0	0
1953	0	46	37571.4	0.00	0.00	4.81162e+06	0	0	0	0	0
1954	0	45	37553.7	0.00	0.00	4.21016e+06	601452	0	0	0	0
1955	0	45	36185.5	0.00	0.00	2.10508e+06	2.40581e+06	300726	0	0	0
1956	0	40	34909.4	0.00	0.00	300726	4.21016e+06	300726	0	0	0
1957	0	40	33730.6	0.00	0.00	3.60871e+06	601452	601452	0	0	0
1958	0	40	32665.9	0.00	0.00	4.51089e+06	300726	0	0	0	0
1959	0	58	31719.3	0.00	0.00	3.90944e+06	902178	0	0	0	0
1960	0	59	30910.5	0.00	0.00	2.10508e+06	601452	2.10508e+06	0	0	0
1961	0	45	30240.3	0.00	0.00	1.2029e+06	2.10508e+06	1.50363e+06	0	0	0
1962	0	37	29729.8	0.00	0.00	3.00726e+06	601452	601452	0	300726	0
1963	0	46	29375	0.00	0.00	0	0	0	0	0	0
1964	0	51	29193.5	0.00	0.00	0	0	0	0	0	0
1965	0	57	29161.4	0.00	0.00	0	3.00726e+06	0	0	0	0
1966	0	53	29161.4	0.00	0.00	0	4.81162e+06	0	0	0	0
1967	0	53	29178.4	0.00	0.00	1.2029e+06	2.40581e+06	1.2029e+06	0	0	0
1968	0	53	29339.8	0.00	0.00	2.40581e+06	1.50363e+06	902178	0	0	0
1969	0	40	29665.4	0.00	0.00	601452	3.30799e+06	601452	0	300726	0
1970	0	28	30157.2	0.00	0.00	300726	3.60871e+06	601452	0	300726	0
1971	0	38	30800.9	0.00	0.00	1.50363e+06	0	902178	0	0	0
1972	0	40	30866	0.00	0.00	902178	1.50363e+06	1.80436e+06	601452	0	0
1973	0	40	28767.7	0.00	0.00	2.10508e+06	902178	1.50363e+06	0	300726	0
1974	0	46	26645.3	0.00	0.00	601452	2.40581e+06	1.50363e+06	0	300726	0
1975	0	42	24542.8	0.00	0.00	0	2.40581e+06	1.80436e+06	0	601452	0
1976	0	42	22466.5	0.00	0.00	0	3.30799e+06	1.2029e+06	0	300726	0
1977	0	43	20423.8	0.00	0.00	1.50363e+06	1.80436e+06	1.50363e+06	0	0	0
1978	0	46	18426.1	0.00	0.00	2.10508e+06	902178	1.2029e+06	300726	300726	0
1979	0	46	16489.8	0.00	0.00	3.00726e+06	601452	902178	0	300726	0
1980	0	46	14639	0.00	0.00	3.30799e+06	300726	1.2029e+06	0	0	0
1981	0	46	12911.6	0.00	0.00	0	3.30799e+06	300726	601452	0	601452
1982	0	51	11361.4	0.00	0.00	0	1.2029e+06	300726	0	601452	2.70653e+06
1983	0	54	10075.5	0.00	0.00	0	3.00726e+06	1.80436e+06	0	0	0
1984	0	53	9064.69	0.00	0.00	0	3.90944e+06	2.10508e+06	0	0	0
1985	0	42	8176.77	0.00	0.00	601452	1.80436e+06	2.40581e+06	0	0	0
1986	0	41	7824.39	0.00	0.00	300726	2.70653e+06	1.50363e+06	300726	0	0
1987	0	40	7653.13	0.00	0.00	0	3.00726e+06	1.50363e+06	300726	0	0
1988	0	46	7003.64	0.00	0.00	0	3.90944e+06	601452	300726	0	0
1989	0	40	7052.96	0.00	0.00	0	3.30799e+06	1.2029e+06	300726	0	0
1990	0	35	7759.99	0.00	0.00	0	4.51089e+06	0	0	0	300726
1991	0	40	8994.17	0.00	0.00	0	4.81162e+06	0	0	0	0
1992	0	36	10554.9	0.00	0.00	1.50363e+06	2.10508e+06	902178	0	0	300726
1993	0	34	12115.2	0.00	0.00	4.21016e+06	1.80436e+06	0	0	0	0
1994	0	37	13367.5	0.00	0.00	1.50363e+06	3.30799e+06	0	0	0	0
1995	0	53	14408.4	0.00	0.00	1.2029e+06	3.60871e+06	0	0	0	0
1996	0	60	15688.9	0.00	0.00	2.40581e+06	902178	300726	300726	300726	601452
1997	0	34	15255.8	0.00	0.00	3.90944e+06	902178	0	0	0	0
1998	0	34	14957.6	0.00	0.00	3.60871e+06	1.2029e+06	0	0	0	0
1999	0	34	14932	0.00	0.00	1.50363e+06	2.40581e+06	0	0	601452	300726
[truncated: 787 more rows]
